## 1 ***C. elegans* germ cells divide and differentiate along a folded epithelium**

2 Hannah S. Seidel<sup>1#</sup>, Tilmira A. Smith<sup>1</sup>, Jessica K. Evans<sup>1</sup>, Jarred Q. Stamper<sup>1</sup>, Thomas G. Mast<sup>1</sup>,

3 Judith Kimble<sup>2#</sup>

4 <sup>1</sup>Department of Biology, Eastern Michigan University, Ypsilanti, MI

5 <sup>2</sup>Department of Biochemistry, University of Wisconsin-Madison and HHMI, Madison, WI

6 #Correspondence: [hseidel@emich.edu](mailto:hseidel@emich.edu), [jekimble@wisc.edu](mailto:jekimble@wisc.edu)

### 7 **Abstract**

8         Knowing how stem cells and their progeny are positioned within their tissues is essential  
9 for understanding their regulation. One paradigm for stem cell regulation is the *C. elegans*  
10 germline, which is maintained by a pool of germline stem cells in the distal gonad, in a region  
11 known as the ‘progenitor zone’. The *C. elegans* germline is widely used as a stem cell model, but  
12 the cellular architecture of the progenitor zone has been unclear. Here we characterize this  
13 architecture by creating virtual 3D models of the progenitor zone in both sexes. We show that the  
14 progenitor zone in adult hermaphrodites is essentially a folded epithelium. The progenitor zone in  
15 males is not folded. Analysis of germ cell division shows that daughter cells are born side-by-side  
16 along the surface of the epithelium. Analysis of a key regulator driving differentiation, GLD-1,  
17 shows that germ cells in hermaphrodites differentiate along the path of the folded epithelium, with  
18 previously described “steps” in GLD-1 expression corresponding to germline folds. Our study  
19 provides a three-dimensional view of how *C. elegans* germ cells progress from stem cell to overt  
20 differentiation, with critical implications for regulators driving this transition.

## 21 Introduction

22 Adult stem cells maintain and repair tissues throughout life. Key to their function is that  
23 many stem cells reside in specialized positions within tissues. This positioning ensures that stem  
24 cells contact local support cells and receive the regulatory signals that maintain stem cells in the  
25 self-renewing state (Scheres, 2007). This positioning can also orient stem cell divisions  
26 (Yamashita and Fuller, 2008) and provide a blueprint for daughter cells as they differentiate (Yang  
27 et al., 2017). Examples abound. Stem cells in the mammalian intestine reside in crypts and  
28 differentiate as they move along intestinal villi, away from signaling Paneth cells (van der Flier  
29 and Clevers, 2009). Mouse spermatogonial stem cells reside in the basal layer of the seminiferous  
30 tubule, where they are enwrapped by supporting Sertoli cells (Chen and Liu, 2015); these stem  
31 cells differentiate as they move towards the tubule's lumen. Likewise, in *Drosophila*, germline  
32 stem cells are anchored to and receive signals from adjacent somatic cells and differentiate after  
33 losing contact with these cells (Fuller and Spradling, 2007; Inaba et al., 2015). In plants, stem  
34 cells in the root meristem receive signals from the neighboring quiescent center and differentiate  
35 as the quiescent center is pushed farther and farther away (Aichinger et al., 2012). Thus, in each  
36 of these tissues, daughter cells lose their stem-ness and differentiate as they move away from  
37 the specialized positions occupied by stem cells. The behavior of stem cells and their daughters  
38 is therefore strongly influenced by cell position and can only be understood in the context of tissue  
39 architecture.

40 The *C. elegans* germline provides a tractable model for stem cell regulation (Kimble and  
41 Seidel, 2013). This tissue is maintained by a pool of germline stem cells, located in the 'progenitor  
42 zone' at the distal end of the gonad (Figure 1A-B). Germline stem cells are maintained in the self-  
43 renewing state through their contact with mesenchymal distal tip cells (Figure 1A-B). This contact  
44 activates GLP-1/Notch signaling in germ cells and thereby induces germ cells to transcribe key

45 regulators of the stem cell state (Kershner et al., 2014; Shin et al., 2017). GLP-1/Notch signaling  
46 is high in germ cells in the distal end of the progenitor zone, but falls sharply as germ cells move  
47 proximally (Lee et al., 2016). By contrast, germ cells in the proximal progenitor zone increasingly  
48 express early markers of differentiation, such as GLD-1, although these cells continue to divide  
49 mitotically (e.g. Cinquin et al., 2010; Fox and Schedl, 2015; Roy et al., 2016). Germ cells stop  
50 dividing and become overtly differentiated as they exit the progenitor zone. These patterns in the  
51 progenitor zone persist despite all germ “cells” connecting to a shared cytoplasmic core (the  
52 ‘rachis’) via intercellular bridges (‘ring channels’) (Figure 1A). This simple system has enabled  
53 fundamental discoveries regarding the stem cell niche and cell-to-cell signaling (Austin and  
54 Kimble, 1987; Kimble and White, 1981), stem cell quiescence (Seidel and Kimble, 2015), and the  
55 regulatory network balancing self-renewal and differentiation (reviewed in Kershner et al., 2013).

56         Despite intensive use of the *C. elegans* germline as a stem cell model, two key features  
57 of the progenitor zone remain poorly understood. First is the observation that some germ cell  
58 nuclei in the hermaphrodite progenitor zone reside in the interior of germline tissue, perhaps even  
59 in the middle of the rachis (Morgan et al 2010; Figure 1C, arrowhead). Other germ cell nuclei in  
60 hermaphrodites reside on the surface of the germline, their ring channels thought to point inward  
61 towards the rachis (Figure 1C, arrow). Germ cell nuclei in males virtually always reside on the  
62 surface of the germline, not in the interior (Figure 1D). How can germ cells reside in the interior  
63 of the hermaphrodite progenitor zone? How do these germ cells connect to the rachis? How does  
64 their position influence the rachis’s shape? Answering these questions is essential for  
65 understanding how the position of each germ cell relates to patterns of GLP-1/Notch signaling  
66 and to germ cell differentiation.

67         A second poorly understood feature of the progenitor zone concerns mitotic germ cell  
68 division. Germ cells in the progenitor zone divide continuously and asynchronously under replete

69 conditions (Crittenden et al., 2006; Fox et al., 2011; Seidel and Kimble, 2015). Their divisions are  
70 oriented in all directions relative to the distal-to-proximal axis of the progenitor zone (Crittenden  
71 et al., 2006; Morgan et al., 2010). But how do germ cells undergo cytokinesis while remaining  
72 connected to the rachis? How is cytokinesis oriented relative to the ring channel? How can  
73 neighboring germ cells enter mitosis at different times, despite their shared cytoplasm? Answering  
74 these questions is essential for understanding cell-cycle control in the progenitor zone and lineage  
75 relationships among germ cells.

76 Here we characterize the cellular architecture of the *C. elegans* progenitor zone in both  
77 sexes. Our main finding is that the progenitor zone in adult hermaphrodites is a folded epithelium.  
78 The progenitor zone in males is not folded. We characterize how the hermaphrodite progenitor  
79 zone becomes folded during development, how germline folds change over time, and how these  
80 folds relate to patterns of germ cell differentiation. We also characterize mitotic germ cell divisions,  
81 showing how germ cells remain connected to the rachis during cytokinesis. Our findings provide  
82 new insights into *C. elegans* germ cell differentiation and a foundational knowledge of tissue  
83 architecture in this important stem cell model.

## 84 **Materials and methods**

### 85 **Strains**

86 N2, JK4472 *qls154 [lag-2p::MYR::tdTomato + ttx-3p::GFP] V* (Byrd et al., 2014), NK246  
87 *unc-119(ed4) III; qyls8[lam-1p::lam-1::GFP + unc-119(+)] V* (Ihara et al., 2011), NK364 *unc-*  
88 *119(ed4) III; qyls46[emb-9p::emb-9::mCherry + unc-119(+)] X* (Ihara et al., 2011), JK5681  
89 *ozls5[GLD-1::GFP] I; ltls44 [pie-1p::mCherry::PH(PLC1delta1) + unc-119(+)] V* (Brenner and  
90 Schedl, 2016; Kachur et al., 2008; Schumacher et al., 2005), JK3182 *gld-3(q730) nos-3(q650)/*  
91 *mln1[mls14 dpy-10(e128)] II* (Eckmann et al., 2004), *C. briggsae* JU516, *C. remanei* MY28.

## 92 **Worm maintenance, synchronization, and staging**

93 Worms were maintained at 20°C on nematode growth media spotted with *Escherichia*  
94 *coli* OP50. Nematode growth media contained 3 g/L NaCl, 2.5 g/L peptone, 20 g/L agar, 25 ml/L  
95 1 M potassium phosphate buffer (1 M K<sub>2</sub>HPO<sub>4</sub> mixed with 1 M KH<sub>2</sub>PO<sub>4</sub> to reach a pH of 6.0), 1  
96 mM CaCl<sub>2</sub>, 1 mM MgSO<sub>4</sub>, 5 µg/ml cholesterol, and (sometimes) 2 µg/ml uracil.

97 Animals described as 'adult' were staged 24 hrs post mid-L4, unless otherwise noted.  
98 Larvae were staged by the extent of gonad migration towards the vulva. Animals were classified  
99 as 'early L4' when gonads had migrated ~1/4 of way to the vulva; 'mid-L4' when gonads had  
100 migrated ~1/2–3/4 of the way to the vulva; and 'late L4' when gonads had migrated >3/4 of the  
101 way to the vulva. Animals were classified as 'newly molted adults' when animals had molted into  
102 adulthood but not yet produced embryos.

## 103 **Antibody, F-actin, and DNA staining**

104 *C. elegans* gonads were dissected in PBSTween (PBS/0.1% Tween-20) + 0.25 mM  
105 levamisole. For staining of F-actin, GLD-1, and DAO-5, gonads were fixed in 3%  
106 paraformaldehyde for 30 min, permeabilized in 0.2% Triton X-100 for 10-30 min, then blocked in  
107 1-3% BSA for 30 min. For alpha-tubulin and LNG staining, gonads were fixed in 3%  
108 paraformaldehyde for 15 min, permeabilized in -20°C methanol for 45 min, then blocked in 3%  
109 BSA for 30 min. Incubations with primary antibodies were performed overnight at 4°C with  
110 antibodies diluted in block as follows: rabbit anti-GLD-1 (Cinquin et al., 2010), 1/100; mouse anti-  
111 DAO-5 (Hadwiger et al., 2010), 1/10; mouse anti-alpha tubulin (Sigma, #T5168), 1/200; rabbit  
112 anti-LNG (Crittenden et al., 1994), 1/10. Incubations with secondary antibodies were performed  
113 for 1–2 hrs at room temperature, using Cy-3 donkey anti-mouse (Jackson ImmunoResearch,  
114 #715-165-151), Alexa Fluor 647 donkey anti-mouse (Invitrogen Molecular Probes, #A31571), or

115 Alexa Fluor 647 goat anti-rabbit (Invitrogen Molecular Probes, #A21245). All secondary antibodies  
116 were diluted 1/1,000 in block. F-actin was stained by adding FITC-phalloidin (Invitrogen, #F432)  
117 into the secondary antibody incubation at a 1/50 dilution. DNA was stained by mounting gonads  
118 in Vectashield containing DAPI (Vector Labs, #H-1200).

119 *C. briggsae* and *C. remanei* gonads were fixed and permeabilized as for F-actin staining.  
120 Gonads were treated with 20 ug/mL RNase A at 37°C, then blocked in 3% BSA for 30 min.  
121 Gonads were stained overnight at 4°C with Alexa Fluor 488-phalloidin (Invitrogen, #A12379),  
122 diluted 1/50 in block. DNA was stained with 50 µg/ml propidium iodide at room temperature for  
123 30 min. Gonads were mounted in Vectashield as above.

## 124 **Imaging**

125 Images of antibody stained *C. elegans* gonads were obtained on a Leica SP8 laser-  
126 scanning confocal microscope, using a z-interval of 0.3 µm. Images of *C. briggsae* and *C. remanei*  
127 gonads were obtained on a Zeiss 510 laser-scanning confocal microscope, using a z-interval of  
128 0.5 µm.

129 Myristoylated tdTomato in the distal tip cell was imaged in fixed gonads. Gonads were  
130 fixed and imaged as described above for F-actin staining. Other fluorescent proteins  
131 (mCherry::PLC $\delta^{\text{PH}}$ , GLD-1::GFP, Laminin::GFP, and EMB-9::mCherry) were imaged in live  
132 dissected gonads. Gonads were extruded into sperm media (50 mM HEPES, 25 mM KCl, 45 mM  
133 NaCl, 1 mM MgSO<sub>4</sub>, 5 mM CaCl<sub>2</sub>, 10 mM Dextrose, pH 7.8) containing 0.01% Tween-20, 0.25  
134 mM levamisole, and ~50 ng/ml Hoechst 33342. Gonads were imaged immediately after  
135 dissection, on a Leica SP8 laser-scanning confocal microscope. mCherry::PLC $\delta^{\text{PH}}$  and GLD-  
136 1::GFP were imaged using a z-interval of 0.5 µm. Laminin::GFP and EMB-9::mCherry were  
137 imaged using a z-interval of 2 µm.

138 mCherry::PLC $\delta^{\text{PH}}$  in whole animals was imaged by mounting animals on 4% agar pads in  
139 M9 containing 10 mM NaN<sub>3</sub>. Animals were imaged on a Zeiss Axioimager.Z1 automated  
140 microscope, equipped with a Zeiss AxioCam.MRm camera, filter set #43 HE (excitation BP  
141 550/25, emission BP 605/70, beam splitter FT570), and light source X-Cite 120 PC. Z-stack  
142 images were acquired using a z-interval of 0.75  $\mu\text{m}$ . After imaging, animals were recovered  
143 seeded OP50 plates, then imaged again 24 hrs later. Animals landing on the agar pad on day 2  
144 in a different orientation than on day 1 were excluded from analysis.

145 All images were obtained at 63X magnification, except for images of whole *gld-3 nos-3*  
146 gonads, which were obtained at 40X magnification. Within each experiment, identical imaging  
147 conditions and identical brightness adjustments were used across samples. Brightness  
148 adjustments were limited to linear adjustments, unless otherwise noted. When imaging  
149 hermaphrodites, one gonadal arm was imaged per animal; thus, gonad-to-gonad variation also  
150 reflects animal-to-animal variation.

### 151 **Scanning electron microscopy**

152 Gonads were dissected in PBSTween + 0.25 mM levamisole, and the basal lamina was  
153 removed by digestion in 40 units/ml Type 2 collagenase (Worthington, #LS004174) in PBS for 10  
154 min at room temperature. Gonads were fixed in 3% glutaraldehyde in PBSTween for 48 hours at  
155 4°C; washed three times in ice-cold PBSTween + 5% sucrose; post-fixed in 2% osmium tetroxide  
156 in PBS for 60 min at room temperature; and dehydrated in an ethanol series (50%, 70%, 95%,  
157 100%, 100%, 100%). Final drying was accomplished with hexamethyldisilazane (Electron  
158 Microscopy Sciences, #16700). Gonads were mounted on aluminum stubs using double-sided  
159 carbon tape, and stubs were sputter-coated with gold (SPI Supplies, #12150). Gonads were  
160 imaged at 5 or 8 kV accelerating potential using an Amray 1820 scanning electron microscope.

## 161 **Image annotation and modeling**

162 Models were created from z-stack images of progenitor zones stained for F-actin, DAO-5,  
163 and DNA or progenitor zones expressing mCherry::PLC $\delta^{\text{PH}}$ . Germ cell nuclei were annotated as  
164 single [x, y, z] points at the centers of nuclei (or, for anaphase cells, at points midway between  
165 segregating chromosomes). Nuclei in telophase cells were annotated as two separate nuclei.  
166 Positions of nuclei were annotated automatically, from DAO-5 staining, using a custom macro  
167 script in *ImageJ*. The output of this script was loaded into the *ROI Manager* of *ImageJ* and  
168 inspected and corrected manually, if necessary. Corrections were mostly limited to M-phase  
169 nuclei, which were often mis-identified by the automated script because M-phase nuclei show a  
170 different pattern of DAO-5 localization than interphase nuclei. Ring channels were annotated  
171 manually as single [x, y, z] points at the centers of ring channels. Regions of the rachis were  
172 annotated manually as polygons fitted to splines, using command *run("Fit Spline")*.

173 Models were created by plotting annotations in three dimensions in *MATLAB*. Germ cells  
174 were plotted as 'ball-and-stick' models, with 'balls' representing germ cell nuclei and 'sticks'  
175 connecting germ cell nuclei to their corresponding ring channels. The rachis was plotted as a  
176 volumetric mesh. This mesh was created from the rachis annotation, using the function *v2m()*,  
177 from package *iso2mesh* (Fang and Boas, 2009). Parameters values for *v2m()* were *isovalues* =  
178 *0.5*, *opt* = *2*, *maxvol* = *1*, and *method* = *'cgalsurf'*.

## 179 **Calculating cross-sectional area of the rachis**

180 Cross-sectional area of the rachis was calculated in *ImageJ* from the rachis annotations  
181 of progenitor zones stained for F-actin. Rachis annotations were converted to binary images  
182 (rachis = white; outside rachis = black), and pixels inside the rachis were summed in the z-  
183 direction. The resulting z-projections were computationally straightened along a segmented line



184 drawn manually through the midline of the progenitor zone, using command `run("Straighten...")`.  
 185 Average pixel intensity in the y-direction was calculated for each x-value, using command  
 186 `run("Plot Profile")`. Average pixel intensity was converted to cross-sectional area, using pixel  
 187 height in y-dimension and voxel depth in z-dimension. This method accounts for the re-distribution  
 188 of pixels that occurs during computational straightening.

### 189 **Scoring of cell-cycle stages**

190 Cell-cycle stages were scored using a combination of chromosome morphology, nuclear  
 191 size, and DAO-5 staining, as outlined in the table below (Crittenden et al., 2017; Seidel and  
 192 Kimble, 2015). Using this method, nearly all cells that stain positive for the standard M-phase  
 193 marker phospho-histone H3 were recognizable as M-phase cells (H. Seidel, personal  
 194 observations).

| Stage                                                                             | Nuclear size      | DNA                                                                                        | DAO-5 localization                              |
|-----------------------------------------------------------------------------------|-------------------|--------------------------------------------------------------------------------------------|-------------------------------------------------|
| Interphase, special case:<br>Newly born daughter cells<br>(always occur in pairs) | Very small        | Partially de-condensed;<br>localized near periphery of<br>nucleus                          | Nucleus<br>(nucleolar)                          |
| Interphase                                                                        | Small to<br>large | De-condensed; localized<br>near periphery of nucleus                                       | Nucleus<br>(nucleolar)                          |
| Prophase                                                                          | Large             | Condensed or partially<br>condensed; chromosomes<br>beginning to cluster within<br>nucleus | Nucleus (less well<br>confined to<br>nucleolus) |
| Metaphase                                                                         | Large             | Condensed; chromosomes<br>aligned on metaphase plate                                       | Nucleus and<br>some cytoplasm                   |
| Anaphase                                                                          | -                 | Condensed; chromosomes<br>segregating                                                      | Cytoplasm                                       |
| Telophase                                                                         | Very small        | Partially de-condensed;<br>chromosomes localized in<br>clusters                            | Nucleus and<br>cytoplasm                        |

## 195 **Scoring ring channels as 'open' versus 'closed'**

196 Ring channels were scored as 'open' if we observed a patch of cytoplasm, devoid of F-  
197 actin, in the ring-channel passageway that was bigger than typical bare patches of F-actin in the  
198 cortical F-actin mesh. Ring channels were scored as 'closed' if no such patch of cytoplasm was  
199 observed. The narrowest ring channels we were able to detect as 'open' were ~0.3  $\mu\text{m}$  in  
200 diameter.

## 201 **Scoring of germline folds and progenitor zone boundaries**

202 Progenitor zones were scored as containing germline folds if at least one germ cell in the  
203 progenitor zone was positioned within the interior of the progenitor zone, not in contact with the  
204 outer surface of the gonad. The position of the distal-most fold was scored as the mid-point of the  
205 nucleus of the distal-most germ cell not in contact with the outer surface of the gonad. Progenitor  
206 zone boundaries were drawn as cross-sectional lines distal to the distal-most overtly differentiated  
207 germ cell. Germ cells were classified as overtly differentiated if they showed a 'crescent'  
208 chromosome morphology (Crittenden et al., 2017).

## 209 **Mating inhibition**

210 Males were prevented from mating by isolating them from hermaphrodites in groups of  
211 10-20 at the adult molt. Males were maintained without hermaphrodites for ~48 hrs before  
212 dissection.

## 213 **Quantifying GLD-1 in trios of germ cells**

214 GLD-1 levels in trios of germ cells were quantified in z-stack images of progenitor zones  
215 stained for GLD-1 and F-actin or in progenitor zones expressing GLD-1::GFP and

216 mCherry::PLC $\delta^{\text{PH}}$ . Trios of germ cells were selected according to the following criteria: (i) all three  
217 germ cells were positioned adjacent to one another in physical space; (ii) ring channels of two of  
218 the germ cells were positioned adjacent to one another along the path of the rachis; (iii) the ring  
219 channel of the third germ cell was positioned at least four germ cell diameters away from the ring  
220 channels of the other two germ cells, as measured along the path of the rachis. To control for  
221 photo-bleaching and effects of sample depth, we limited our dataset to trios of germ cells  
222 positioned in the same focal plane. We also limited our dataset to germ cells positioned within the  
223 distal-most 15 rows of germ cells, because GLD-1 levels begin to plateau towards the proximal  
224 boundary of the progenitor zone (Brenner and Schedl, 2016). For GLD-1::GFP, we further limited  
225 our dataset to germ cells positioned in the upper half of the z-stack, because GLD-1::GFP  
226 experienced substantial photo-bleaching in the lower halves of z-stacks. We did not place a distal  
227 boundary on our dataset, but because germline folds were rare in distal-most germ cells, our  
228 dataset did not include any germ cells in the distal-most three rows of cells. We permitted our  
229 dataset to include multiple trios of germ cells from the same progenitor zone, provided that cells  
230 of each trio were positioned at least four or more germ cell diameters away from germ cells in any  
231 other trio, as measured along the path of the rachis. The number of trios qualifying to be included  
232 in our dataset ranged from zero to four, per progenitor zone.

233 For each germ cell in each trio, we quantified GLD-1 levels in the cytoplasm. A region of  
234 interest was drawn manually around the perimeter of the germ cell in *ImageJ*, as determined by  
235 F-actin staining or mCherry::PLC $\delta^{\text{PH}}$  localization. A second region of interest was drawn around  
236 the nucleus, as determined by DNA staining. Mean pixel intensity in the cytoplasm was calculated  
237 by excluding nuclear signal from whole cell signal. Measurements were repeated for every z-slice  
238 within a z-interval of 1.5  $\mu\text{m}$ , centered on the nucleus. Measurements from different z-slices were  
239 averaged to obtain a final measurement per germ cell.

## 240 **Quantifying GLD-1 in germ cells located in backwards loops**

241 Backwards loops were defined as regions of the rachis where the distal-to-proximal path  
242 of the rachis traveled backwards (i.e. in the proximal-to-distal direction). To quantify GLD-1 levels  
243 in germ cells along backwards loops, germ cells were chosen at each of two positions along a  
244 backwards loop: the 'start' of the loop (more distal as measured along the path of the rachis, more  
245 proximal as measured in physical space) and the 'end' of the loop (more proximal as measured  
246 along the path of the rachis, more distal as measured in physical space). Germ cells were chosen  
247 within the same focal plane, to control for effects of photo-bleaching and sample depth. When  
248 possible, three germ cells were chosen at each position. In cases where three germ cells could  
249 not be found meeting the above criteria, only two germ cells were chosen at a position. GLD-1  
250 levels were quantified in the cytoplasm of each germ cell, as described above. Measurements  
251 were averaged across germ cells within each position to obtain a final measurement for the 'start'  
252 position and a final measurement for the 'end' position.

## 253 **Quantifying GLD-1 along the path of the rachis**

254 GLD-1 levels along the path of the rachis were quantified in z-stack images of progenitor  
255 zones expressing GLD-1::GFP and mCherry::PLC $\delta^{\text{PH}}$ . Single z-slices were identified in which the  
256 path of the rachis remained in the same focal plane for at least  $\sim 25 \mu\text{m}$ , as measured along the  
257 path of the rachis. Straight or segmented lines were drawn manually through the midline of the  
258 rachis in *ImageJ*, with a line width of 25 pixels ( $\sim 3.5 \mu\text{m}$ ). GLD-1 levels were quantified along the  
259 line, using the command `run("Plot Profile")`. GLD-1 levels could not be quantified throughout the  
260 entire progenitor zone (along the full trajectory of the rachis), because GLD-1::GFP experienced  
261 substantial photo-bleaching and was therefore dimmer in lower z-slices. Anti-GLD-1 staining was  
262 also not an appropriate tool for quantifying GLD-1 levels throughout the entire progenitor zone

263 because this staining experienced non-uniform permeation of the tissue and was therefore  
264 dimmer at more interior regions of the rachis.

### 265 **Scoring of GLD-1 steps**

266 GLD-1 steps were scored in z-stack images of progenitor zones stained for GLD-1 and F-  
267 actin or in progenitor zones expressing GLD-1::GFP and mCherry::PLC $\delta^{\text{PH}}$ . GLD-1 steps were  
268 defined as distinct changes in GLD-1 levels occurring between neighboring patches of three or  
269 more germ cells. This definition is similar to methods used previously (Cinquin et al., 2015, 2010),  
270 but is subjective because it requires interpretation of the word 'distinct'. Despite this subjectivity,  
271 two researchers scoring GLD-1 steps independently nearly always identified GLD-1 steps in the  
272 same locations (H. Seidel, S. Crittenden, personal observations). Randomly selected examples  
273 of GLD-1 steps are shown in Figure S5.

274 GLD-1 steps were scored as coincident with germline folds if germ cells on either side of  
275 the step connected to regions of the rachis separated by a distance of four or more germ cell  
276 diameters, as measured along the path of the rachis. This analysis included only GLD-1 steps in  
277 the upper half of each z-stack, to reduce internal correlations in the dataset.

### 278 **Statistics**

279 Statistical tests were performed in *R* ([cran.r-project.org](http://cran.r-project.org)) using the function *t.test()* or  
280 *pchisq()*. For  $X^2$  goodness-of-fit tests, tails of the expected distribution were pooled to have no  
281 expected values less than 1.0, as recommended by Cochran (1954).

### 282 **Plots**

283 Plots were generated in *MATLAB* or using the *ggplot* package ([ggplot2.org](http://ggplot2.org)) for *R*.

## 284 **Results**

### 285 **Structure of the progenitor zone: Folded in hermaphrodites, not folded in males**

286 To investigate the cellular architecture of the distal gonad, we imaged progenitor zones in  
287 dissected gonads and transformed our images into virtual 3D models. Models were created by  
288 annotating the positions of germ cell nuclei, ring channels, and the rachis. Nuclei were annotated  
289 by staining DNA and DAO-5, a nucleolar protein (Hadwiger et al., 2010; Korčeková et al., 2012).  
290 Ring channels and the rachis were annotated by staining filamentous actin (F-actin), which  
291 localizes to the cortex, but is absent from ring-channel passageways (Figure 1E). This modeling  
292 approach allowed us to visualize the shape of the rachis and the orientation of each germ cell  
293 relative to the rachis (Figure 2G-H).

294 Models revealed that progenitor zones in adult hermaphrodites were folded (Figure 2G).  
295 In every gonad examined (n = 41), the epithelial surface of the progenitor zone folded in and out  
296 repeatedly, bringing germ cells into the interior of the tissue. These folds caused the rachis to  
297 follow a circuitous path. As a consequence, germ cells located immediately adjacent to one  
298 another in physical space were often connected to regions of the rachis on opposite sides of a  
299 germline fold (Figure 2C and 2E, arrowheads). The placement and shape of folds varied widely  
300 from one animal to the next, except that folds were usually absent in the distal-most ~3-5 rows of  
301 germ cells (Figure S1, Figure S2). Folds became shallower and less frequent in the meiotic region  
302 of the gonad, concomitant with expansion of the rachis in this region (n = 30; Figure 2A). Folds  
303 were also visible using the plasma membrane marker mCherry::PLC $\delta^{\text{PH}}$ , confirming the validity  
304 of F-actin staining (Figure S3). These results show that the progenitor zone in adult  
305 hermaphrodites is folded, and that germ cells in the interior of the progenitor zone reside within  
306 epithelial folds (Figure 2I).

307 We next extended our modeling to males. We predicted that male progenitor zones would  
308 lack folds, because male progenitor zones lack germ cell nuclei in the interior of the tissue  
309 (Morgan et al., 2010; Figure 1D). Consistent with this prediction, we did not observe folds in male  
310 progenitor zones (n = 35; Figure 2H). We conclude that folds are a sexually dimorphic feature of  
311 animals grown under standard laboratory conditions (Figure 2J).

### 312 **Germ cell architecture during mitotic division**

313 To investigate mitotic germ cell divisions in cellular detail, we examined dividing germ cells  
314 in fixed tissues. We visualized the mitotic spindle with alpha tubulin and the cytokinetic ring with  
315 F-actin. F-actin also allowed us to monitor any changes to the ring channel occurring during  
316 division. This analysis revealed that germ cells divided in a stereotyped pattern in both sexes  
317 (Table 1, Figure 3). Upon entry into mitosis, germ cells closed their ring channels (Table 1, Figure  
318 3Aii-iii, arrowhead). Ring channels transformed from an 'open' configuration, in which the ring-  
319 channel passageway was easily visible as a patch of cytoplasm devoid of F-actin or plasma  
320 membrane, to a 'closed' configuration, in which the ring-channel passageway was too narrow to  
321 be resolved by our imaging conditions ( $<0.3 \mu\text{m}$  in diameter; Figure 3A-B). Next, germ cells  
322 assembled the mitotic spindle parallel to the face of the rachis (n = 51 dividing cells; Figure 3C).  
323 Daughter nuclei separated along this face (Figure 3C-D). The cytokinetic ring assembled  
324 perpendicular to the face of the rachis (n = 49 dividing cells; Figure 3Avi-vii, arrow), and cleavage  
325 ingressed towards the rachis, as evidenced by late-stage (i.e. small) cytokinetic rings always  
326 abutting face of the rachis (n = 17 dividing cells; Figure 3Avii, arrow). Ring channels remained  
327 closed through the end of mitosis (Table 1), then ring channels bifurcated and re-opened in newly  
328 born daughter cells (Figure 3Aviii, arrowhead). Ring channels in daughter cells were always  
329 positioned side-by-side, flanking the site of cytokinesis (n = 50 pairs of daughter cells; Figure  
330 3Aviii). Together, these results show that germ cells divide by closing their ring channels and

331 cleaving along the face of the rachis (Figure 3F). An important implication of this finding is that  
332 germ cells positioned near each other along the path of the rachis are closely related by lineage;  
333 germ cells positioned near each other in physical space, by contrast, may or may not be closely  
334 related, depending on their position along the rachis (e.g. Figure 2C and 2E, arrowheads).

335 Our observation of ring-channel closure during division lead us to hypothesize that ring-  
336 channel closure might limit cytoplasmic exchange in or out of dividing germ cells. Consistent with  
337 this hypothesis, we observed that at least one protein—DAO-5—was seemingly unable to diffuse  
338 across ‘closed’ ring channels (Figure 3E). DAO-5 was released into germ cell cytoplasm during  
339 division, upon breakdown of the nuclear envelope, but DAO-5 did not diffuse into neighboring  
340 germ cells, nor into the adjoining region of the rachis (n = 50 dividing cells; Figure 3E). This result  
341 suggests that ‘closed’ ring channels in dividing germ cells limit the diffusion of at least some  
342 cellular contents.

#### 343 **The distal tip cell extends into germline folds, but the basement membrane does not**

344 Germ cells in the progenitor zone are regulated by their interaction with the distal tip cell,  
345 located at the distal end of the gonad (Kimble and White, 1981; Figure 1A-B). The distal tip cell  
346 in hermaphrodites forms a plexus around distal-most germ cells and extends processes  
347 proximally, some of which project deep into the interior of the progenitor zone (Byrd et al., 2014;  
348 Linden et al., 2017; Starich et al., 2014). We hypothesized that these processes reach the interior  
349 of the progenitor zone by traveling along germline folds. We imaged distal tip cells expressing  
350 myristoylated tdTomato and observed that whenever processes of the distal tip cell projected  
351 towards the interior of the progenitor zone, they always traveled along germline folds and never  
352 projected into the rachis itself (n = 17 progenitor zones; Figure 4A-B). Thus, processes of the  
353 distal tip cell in hermaphrodites extend into germline folds but not into the rachis (Figure 4D).



354 A major determinant of tissue structure in animals is the basal lamina. In *C. elegans*, a  
355 basal lamina surrounds the gonad and controls gonad girth and migration of the distal tip cell  
356 (Clay and Sherwood, 2015; Kramer, 2005). We therefore asked whether the basal lamina extends  
357 into germline folds. To visualize the basal lamina, we imaged two of its components: GFP-tagged  
358 laminin and mCherry-tagged EMB-9, a type IV collagen (Ihara et al., 2011). We observed that  
359 both proteins localized to the outer surface of the hermaphrodite progenitor zone but were largely  
360 absent from progenitor zone's interior (n = 16-20 progenitor zones; Figure 4C). We conclude that  
361 the basal lamina does not extend into germline folds (Figure 4D).

### 362 **Germline folds develop during the L4 larval stage**

363 To understand how germline folds form during development, we examined larval  
364 germlines. The *C. elegans* germline develops from two primordial germ cells born during  
365 embryogenesis. These primordial germ cells and their descendants divide during larval  
366 development to produce an adult hermaphrodite germline containing ~1,000 germ cells per  
367 gonadal arm. We focused our analysis on the (final) L4 larval stage, because the bulk of germline  
368 expansion occurs during this stage (Kimble and Crittenden, 2005), and because germline folds  
369 appeared to be absent in larvae younger than L4. To investigate fold formation during L4, we  
370 imaged and modelled progenitor zones in four stages: Early L4s; mid L4s; late L4s; and newly  
371 molted adults. Germline folds were largely absent in early L4s but became common at later stages  
372 (Figure 5D). Moreover, folds deepened as larvae matured (Figure 5B-C). Folds in mid L4s were  
373 typically shallow, often consisting of a single germ cell tucked beneath the outer surface of the  
374 progenitor zone (Figure 5B-C). Folds in late L4s were deeper, extending farther into the interior  
375 of the progenitor zone (Figure 5B-C). Folds in newly molted adults were deeper still, similar to  
376 folds in our initial cohort of adults (aged ~24-hrs post mid-L4) (Figure 5B-C). We conclude that

377 germline folds begin during the L4 larval stage and become more pronounced as animals reach  
378 adulthood (Figure 5A).

### 379 **Germline folds change over time**

380 Germ cells in the progenitor zone are constantly dividing and moving in the distal-to-  
381 proximal direction, as cells more distal to them divide (Crittenden et al., 2006; Rosu and Cohen-  
382 Fix, 2017). We therefore hypothesized that germline folds in hermaphrodite progenitor zones  
383 might change over time, collapsing in and out, shifting location, or moving in the distal-to-proximal  
384 direction with the overall movement of cells. To test this possibility, we examined progenitor zones  
385 in live animals expressing the plasma membrane marker mCherry::PLC $\delta^{\text{PH}}$ . Animals were imaged  
386 on day 1 of adulthood then again on day 2. The interval between timepoints (~24 hrs) was more  
387 than double the median cell-cycle length in the hermaphrodite progenitor zone (Fox et al., 2011;  
388 Seidel and Kimble, 2015) and should therefore allow for complete or near complete tissue  
389 turnover. In every gonad examined (n = 9), the shapes and positions of germline folds differed  
390 dramatically on the two days analyzed (Figure 5E, Figure S4). By contrast, the girth of each gonad  
391 remained similar over time (i.e. wider gonads remained wide, narrower gonads remained narrow).  
392 We conclude that germline folds are not static but instead move and change in shape over time.

### 393 **Folds are induced under conditions of germ cell crowding**

394 What causes germline folds? Why do folds occur in hermaphrodites, but not in males?  
395 One possibility is that folds form passively, due to germ cell crowding. This possibility might  
396 explain the absence of folds in male progenitor zones, if germ cells are less crowded in males,  
397 given that sperm are produced and expelled more quickly than oocytes. To investigate this  
398 possibility, we asked whether excess germ cell crowding would induce germline folds in places  
399 where folds are normally absent. Germ cell crowding was induced in two ways. First, we

400 prevented males from mating, which causes male gonads to become packed with sperm. Second,  
401 we used *gld-3 nos-3* loss-of-function mutants. *gld-3 nos-3* gonads fill with mitotically dividing cells  
402 ('germline tumors') (Eckmann et al., 2004), and hence germ cells become crowded along the  
403 length of the gonad. Both experiments resulted in germline folds: Male progenitor zones became  
404 folded in the absence of mating (n = 24; Figure 6A), and tumorous *gld-3 nos-3* gonads became  
405 folded in both sexes (n = 10-13; Figure 6B-C). The folding in *gld-3 nos-3* gonads was extensive,  
406 with the rachis transformed into a maze of narrow, convoluted passageways. Though this  
407 complexity made it difficult to map the path of the rachis in all areas of *gld-3 nos-3* gonads, we  
408 could map this path in some areas (Figure 6B'), and folds were evident along the length of these  
409 gonads. We conclude that germline folds can form in both sexes and in all areas of the gonad,  
410 under conditions of germ cell crowding (Figure 6D-E).

#### 411 **Germ cell differentiation tracks the path of the rachis**

412 Germ cell differentiation in *C. elegans* is traditionally viewed as occurring along a straight,  
413 distal-to-proximal path through the progenitor zone (e.g. Cinquin et al., 2010; Fox and Schedl,  
414 2015; Lee et al., 2016). Yet our discovery of germline folds shows that germ cells do not move  
415 along a straight path, but instead move along the path defined by folds and the rachis. In addition,  
416 our analysis of germ cell division shows that lineage relationships among germ cells track the  
417 path of the rachis, not the distal-proximal axis (i.e. germ cells are mostly closely related, by  
418 lineage, to their neighbors along the rachis, not to their neighbors along the distal-proximal axis).  
419 We therefore asked if germ cell differentiation — like germ cell movement and lineage  
420 relationships — tracks the path of the rachis.

421 To test this possibility, we assessed the stage of differentiation in trios of germ cells  
422 positioned adjacent to one another in physical space, at essentially the same point along the  
423 distal-proximal axis. Each trio included two germ cells immediately adjacent to one another along

424 the path of the rachis and a third germ cell positioned four or more germ cell diameters more  
425 proximally along this path (Figure 7A). The stage of differentiation of each germ cell was assessed  
426 by quantifying GLD-1, a protein whose levels rise as germ cells differentiate (Brenner and Schedl,  
427 2016; Jones et al., 1996). GLD-1 abundance was quantified using a GLD-1 antibody (Cinquin et  
428 al., 2010) or a GLD-1::GFP transgene (Brenner and Schedl, 2016; Schumacher et al., 2005).  
429 Though this method of quantification is inherently noisy (Waters, 2009), we observed that GLD-1  
430 levels were indistinguishable, on average, in the two germ cells positioned adjacent to one  
431 another along the rachis (Figure 7B). GLD-1 levels were two- to three-fold higher, on average, in  
432 the third germ cell (Figure 7B). Thus, although all three germ cells were positioned at essentially  
433 the same point along the distal-proximal axis, the two germ cells lying adjacent along the rachis  
434 were at a similar stage of differentiation, whereas the third germ cell, lying several germ cell  
435 diameters more proximally along the rachis, had advanced in its differentiation. This result shows  
436 that stage of differentiation in each germ cell corresponds better with position along the rachis  
437 than with position along the distal-proximal axis of the progenitor zone.

438         As a second test of the idea that germ cell differentiation tracks the path of the rachis, we  
439 examined GLD-1 levels in the subset of progenitor zones where the rachis had looped backwards  
440 on itself. Backwards looping was observed in ~15% (n = 75) of progenitor zones and allowed us  
441 to compare GLD-1 levels among germ cells whose positions along the distal-proximal axis were  
442 reversed relative to their positions along the path of the rachis. We observed that in every  
443 backwards loop, GLD-1 levels were lower in germ cells at the start of the loop than in germ cells  
444 residing closer to the end of the loop (Figure 7C-D). This result confirms that GLD-1 levels  
445 increase as germ cells move proximally along the rachis, even when the path of the rachis  
446 deviates dramatically from a straight, distal-to-proximal trajectory through the progenitor zone.

447 We conclude that germ cell differentiation tracks the path of the rachis, rather than a straight,  
448 distal-to-proximal path through the progenitor zone.

#### 449 **Germline folds create the illusion of step-like changes in GLD-1 expression levels**

450 GLD-1 expression in the hermaphrodite progenitor zone is often patchy — GLD-1 levels  
451 often change abruptly, in steps between neighboring groups of germ cells (Cinquin et al., 2015,  
452 2010; Figure 8A, Figure S5). Complex models have been proposed to explain these GLD-1 steps  
453 (Cinquin et al., 2015), but our discovery of germline folds suggested a simpler idea: GLD-1 steps  
454 might be "illusions" created by germline folds bringing together, in physical space, germ cells  
455 distant along the rachis. Under this scenario, GLD-1 levels might rise gradually (not abruptly)  
456 along the path of the rachis, but this rise might appear abrupt when distant groups of germ cells  
457 are brought together by a germline fold. To test this hypothesis, we mapped GLD-1 steps relative  
458 to germline folds. GLD-1 steps were identified using a GLD-1 antibody or a GLD-1:GFP  
459 transgene, and germline folds were mapped using F-actin staining or expression of the plasma  
460 membrane marker mCherry::PLC $\delta^{\text{PH}}$ . We observed that GLD-1 steps always coincided with  
461 germline folds: Germ cells on opposite sides of a GLD-1 step were always positioned on opposite  
462 sides of a germline fold (Table 2, Figure 8A). GLD-1 steps never passed through the cytoplasm  
463 of the rachis and never crossed between germ cells at the same point along the rachis. Instead,  
464 GLD-1 levels always changed gradually when measured along the rachis (n = 20; Figure 8B).  
465 These results suggest that GLD-1 levels rise gradually as germ cells differentiate, and that this  
466 rise only appears abrupt when viewed across a germline fold.

467 As a second test of our hypothesis that GLD-1 steps are an outcome of germline folds, we  
468 examined GLD-1 expression in males. Male progenitor zones normally lack GLD-1 steps (Cinquin  
469 et al., 2015; Figure 8C), and males also normally lack germline folds (Figure 2J). We predicted  
470 that if GLD-1 steps are an outcome of germline folds, then inducing germline folds in males should

471 also induce GLD-1 steps. Consistent with this prediction, male progenitor zones with germline  
472 folds (induced by absence of mating) also developed GLD-1 steps (Table 2, Figure 8D). These  
473 GLD-1 steps in males, like GLD-1 steps in hermaphrodites, always coincided spatially with  
474 germline folds (Table 2). We conclude that GLD-1 steps can occur in both sexes, and that GLD-  
475 1 steps always coincide with germline folds.

#### 476 **Germline folds are conserved in *C. briggsae* and *C. remanei***

477 We asked whether germline folds were conserved in the related nematode species *C.*  
478 *briggsae* (hermaphrodite/male) and *C. remanei* (female/male). We observed that progenitor  
479 zones in these species were structured similarly to progenitor zones in *C. elegans*, with folds  
480 found consistently in *C. briggsae* hermaphrodites and *C. remanei* females (n = 10 per species,  
481 Figure S6). Yet in contrast to *C. elegans* males (Figure 2J), germline folds were also found in *C.*  
482 *briggsae* and *C. remanei* males (n = 10 per species; Figure S6). Thus, germline folds are largely  
483 conserved in the *Elegans* group of *Caenorhabditids*, although the sexual dimorphism of folding  
484 varies among species.

#### 485 **Discussion**

486 Our study describes the three-dimensional structure of the *C. elegans* progenitor zone, a  
487 key model for understanding germ cell development and stem cell control. Our main result is that  
488 the progenitor zone in adult hermaphrodites is folded. The epithelial surface of the hermaphrodite  
489 progenitor zone folds in and out, bringing germ cells into the interior of the tissue and causing the  
490 rachis to follow a circuitous, folded path (Figure 2I). The male progenitor zone, by contrast, is not  
491 folded (Figure 2J). Germ cells are born side-by-side along the path of the rachis (Figure 3F), and  
492 position along this path determines a germ cell's stage of differentiation (Figure 8E). Germline  
493 folds in hermaphrodites begin during L4 larval development (Figure 5A), change over time (Figure

494 5E), and form ectopically under conditions of germ cell crowding (Figure 6E). These findings  
495 redefine spatial relationships within the progenitor zone and provide a new spatial framework for  
496 future studies in this important system.

#### 497 **New view of germ cell differentiation**

498 *C. elegans* germ cells differentiate as they move proximally, away from the distal tip cell  
499 (Kimble and Seidel, 2013). Past models measured this process as a function of germ cell position  
500 along the straight, distal-proximal axis of the progenitor zone. Past models asserted that germ  
501 cells positioned more distally within the progenitor zone would be at an earlier stage of  
502 differentiation than germ cells positioned more proximally. Likewise, germ cells positioned at the  
503 same point along the distal-proximal axis were assumed to be at similar stages of differentiation.

504 Our study refines this traditional model. While the general principle remains true that germ  
505 cells differentiate as they move proximally, we now find that the path of germ cell movement does  
506 not always follow a straight line. In males, the path of germ cell movement is indeed straight,  
507 consistent with the traditional view (Figure 8E). In hermaphrodites, by contrast, germ cells move  
508 proximally within germline folds. The path defined by these folds is winding and circuitous and  
509 hence does not follow a straight line (Figure 8E). Thus, germ cell differentiation in both sexes  
510 advances as germ cells move proximally along the path of the rachis, although the shape of this  
511 path in hermaphrodites is complex.

512 Most studies of germ cell differentiation in *C. elegans* have not considered the proximal  
513 movement of germ cells along a circuitous path. Given our results, we suggest that germ cell  
514 differentiation is driven by factors that function within germ cells as they move proximally along  
515 the rachis, rather than factors that function by tracking position along the distal-proximal axis. A  
516 simple model consistent with our study is that germ cells begin differentiating after exiting a distal-  
517 most pool of naïve germ cells, then become overtly differentiated after a fixed number of cell

518 divisions or a fixed time interval thereafter. This model is consistent with GLP-1/Notch signaling  
519 being confined to the distal-most few rows of germ cells (Lee et al., 2016) and with germ cells  
520 differentiating after one or two cell divisions following loss of GLP-1/Notch signaling (Fox and  
521 Schedl, 2015).

522 Our study provides a simple explanation for apparent “steps” of gene expression in the  
523 progenitor zone that had been puzzling. The expression of many germ cell regulators is graded  
524 in the progenitor zone (e.g. Brenner and Schedl, 2016; Kershner et al., 2014; Lee et al., 2016),  
525 but expression of these regulators can be patchy, characterized by abrupt, step-like changes in  
526 expression levels between neighboring groups of germ cells. These steps are most pronounced  
527 for GLD-1 (Cinquin et al., 2010), but have also been observed for other germ cell regulators (H.  
528 Shin, K. Haupt, H. Seidel, personal observations). A previous study proposed that these GLD-1  
529 steps reflect a slowing of distal-to-proximal diffusion at specific locations in the progenitor zone,  
530 perhaps caused by constriction of the rachis (Cinquin et al., 2015). Our clarification of progenitor-  
531 zone architecture reveals a simpler explanation. We find that GLD-1 steps correspond to germline  
532 folds. These folds bring together germ cells from different points along the rachis and hence at  
533 different stages of differentiation. We therefore suggest that the GLD-1 steps do not reflect abrupt  
534 changes in expression. We cannot exclude the possibility that germline folds influence germ cell  
535 differentiation, but we instead favor a simpler model in which germ cells differentiate along the  
536 path of the rachis, independent of the shape and placement of germline folds. This view is  
537 consistent with germline folds being highly variable in hermaphrodites (Figure S1, Figure S2),  
538 including some animals with very limited folds (Figure S1B), and with folds being absent in males  
539 (Figure 2J). This view is also consistent with our finding that germline folds do not occur at  
540 reproducible locations in the progenitor zone (Figure S2F).



541 Germ cell position along the distal-proximal axis is commonly used as a metric for  
542 characterizing gene expression in the progenitor zone, especially with respect to germ cell  
543 differentiation (e.g. Brenner and Schedl, 2016; Lee et al., 2016). This metric is user-friendly and  
544 will undoubtedly remain valuable, but we emphasize that position along the distal-proximal axis  
545 can be a poor proxy for a germ cell's stage of differentiation. Germ cells residing at essentially  
546 the same point along the distal-proximal axis are sometimes at very different stages of  
547 differentiation, and the direction of differentiation along this axis is reversed, where the path of the  
548 rachis loops backwards on itself. Thus, germ cell position along the distal-proximal axis is  
549 imperfectly correlated with stage of differentiation, and future studies must take this imprecision  
550 into account.

#### 551 **Germ cell division and ring-channel closure**

552 Germ cells in virtually all animals are syncytial, connected to other germ cells via  
553 intercellular bridges ('ring channels' in *C. elegans*) (Greenbaum et al., 2011; Matova and Cooley,  
554 2001). These bridges arise in many species through incomplete cytokinesis and stabilization of  
555 the cytokinetic ring (Haglund et al., 2011). Incomplete cytokinesis occurs in the *C. elegans* embryo  
556 when the P<sub>4</sub> cell division gives rise to the two primordial germ cells (Goupil et al., 2017). This  
557 mechanism differs from our observations in germ cells of L4 larvae and adults, in which the ring  
558 channel bifurcates during division (Figure 3F). This latter mechanism is reminiscent of primordial  
559 germ cell formation in *Drosophila* (Cinalli and Lehmann, 2013) and is strikingly similar to germ  
560 cell division in clitellate annelids (earthworms and leeches) (Swiatek et al., 2009). Germ cells in  
561 clitellate annelids connect to a shared cytoplasmic core (Urbisz et al., 2015), and ring channels in  
562 this taxon bifurcate during division by being 'pinched' in two by the cytokinetic ring (as shown by  
563 transmission electron microscopy in Swiatek et al., 2009). We hypothesize that ring channels in

564 *C. elegans* bifurcate using this same mechanism (Figure 3F), although future work is needed to  
565 image the bifurcation at higher resolution.

566 Ring channels in *C. elegans* germ cells close during division. One possible function of this  
567 closure is to block diffusion of cytoplasm into or out of dividing cells. Such blockage would prevent  
568 cell-cycle regulators from leaving the cell, thus allowing neighboring germ cells to cycle  
569 asynchronously, despite each cell connecting to a shared rachis cytoplasm. Such blockage is  
570 consistent with our observation that ring-channel closure blocks diffusion of DAO-5 from mitotic  
571 cells (Figure 3E). Similar blockage has been reported in *C. elegans* embryos, where the small  
572 size or composition of the intercellular bridge connecting primordial germ cells limits diffusion  
573 between them (Amini et al., 2014; Goupil et al., 2017). Ring-channel closure during division might  
574 be regulated by the same factors regulating ring-channel size in meiosis (Rehain-Bell et al., 2017)  
575 and cellularization of the oocyte (Lee et al., 2017). Ring channels are enriched for regulators of  
576 contractility (Amini et al., 2014; Maddox et al., 2005; Zhou et al., 2013) and might close via  
577 contraction of an actomyosin ring; alternatively, ring channels might close via release of a tension  
578 force holding the ring channel open during interphase.

## 579 **Fold formation and function**

580 Many tissues form folds — brains, guts, kidneys, and lungs, to name a few. Folds can  
581 form through active cellular mechanisms (e.g. polarized contraction), passive physical  
582 mechanisms (e.g. mechanical instability) or both (Andrew and Ewald, 2010; Nelson, 2016; Pearl  
583 et al., 2017). Folds in epithelial sheets are often formed by unequal growth rates. When an  
584 epithelial sheet grows faster than its underlying substrate, the sheet will buckle and form a fold  
585 (reviewed in Nelson, 2016; Taber, 2014). We hypothesize that this same mechanism is  
586 responsible for forming folds in the *C. elegans* germline. Our model is that as germ cells divide,  
587 the cellular surface of the germline outgrows the basal lamina surrounding the gonad. As a

588 consequence, the germline epithelium buckles inward to form a fold. This model is consistent with  
589 the shape and placement of germline folds being highly variable from one animal to the next  
590 (Figure S1, Figure S2) and with germline folds being induced under conditions of germ cell  
591 crowding (Figure 6).

592 Folds increase the surface area of an epithelium. This increase in the *C. elegans* germline  
593 allows the progenitor zone to package more germ cells into a space of confined dimensions. Folds  
594 likely do not serve a major role in stem cell control, because folding is absent in males and is  
595 sometimes very limited even in hermaphrodites (e.g. Figure S1B). We suggest instead that the  
596 increased number of germ cells accommodated by folds is critical for expanding the rachis to  
597 generate and supply large oocytes.

## 598 **Acknowledgements**

599 We thank Sarah Crittenden for helpful discussions, Jane Hubbard for pointing out useful  
600 references, and David Greenstein for advice on preparing samples for scanning electron  
601 microscopy. We thank Jadwiga Forster for media preparation, Peggy Kroll-Conner for strain  
602 maintenance, and Janie Lawson, Glenn Walker, and Bob Winning for comments on the  
603 manuscript. For strains, we thank David Sherwood, Tim Schedl, and the *Caenorhabditis* Genetics  
604 Center, which is supported by NIH (P40 OD01044). JK is an investigator of the Howard Hughes  
605 Medical Institute. TAS was supported by a Symposium Undergraduate Research Fellowship  
606 Award donated by Bill Fennel.

## 607 **References**

- 608 Aichinger, E., Kornet, N., Friedrich, T., and Laux, T. (2012). Plant Stem Cell Niches. In Annual  
609 Review of Plant Biology, Vol 63, S.S. Merchant, ed. (Palo Alto: Annual Reviews), pp. 615–636.
- 610 Amini, R., Goupil, E., Labella, S., Zetka, M., Maddox, A.S., Labbé, J.-C., and Chartier, N.T.  
611 (2014). *C. elegans* Anillin proteins regulate intercellular bridge stability and germline syncytial  
612 organization. *J. Cell Biol.* 206, 129–143.
- 613 Andrew, D.J., and Ewald, A.J. (2010). Morphogenesis of epithelial tubes: Insights into tube  
614 formation, elongation, and elaboration. *Dev. Biol.* 341, 34–55.
- 615 Austin, J., and Kimble, J. (1987). *glp-1* is required in the germ line for regulation of the decision  
616 between mitosis and meiosis in *C. elegans*. *Cell* 51, 589–599.
- 617 Brenner, J.L., and Schedl, T. (2016). Germline Stem Cell Differentiation Entails Regional  
618 Control of Cell Fate Regulator GLD-1 in *Caenorhabditis elegans*. *Genetics* 202, 1085–1103.
- 619 Byrd, D.T., Knobel, K., Affeldt, K., Crittenden, S.L., and Kimble, J. (2014). A DTC niche plexus  
620 surrounds the germline stem cell pool in *Caenorhabditis elegans*. *PLoS One* 9, e88372.
- 621 Chen, S.-R., and Liu, Y.-X. (2015). Regulation of spermatogonial stem cell self-renewal and  
622 spermatocyte meiosis by Sertoli cell signaling. *Reproduction* 149, R159–R167.
- 623 Cinalli, R.M., and Lehmann, R. (2013). A spindle-independent cleavage pathway controls germ  
624 cell formation in *Drosophila*. *Nat. Cell Biol.* 15, 839–845.
- 625 Cinquin, A., Zheng, L., Taylor, P.H., Paz, A., Zhang, L., Chiang, M., Snow, J.J., Nie, Q., and  
626 Cinquin, O. (2015). Semi-permeable Diffusion Barriers Enhance Patterning Robustness in the  
627 *C. elegans* Germline. *Dev. Cell* 35, 405–417.
- 628 Cinquin, O., Crittenden, S.L., Morgan, D.E., and Kimble, J. (2010). Progression from a stem  
629 cell-like state to early differentiation in the *C. elegans* germ line. *Proc. Natl. Acad. Sci. U. S. A.*  
630 107, 2048–2053.
- 631 Clay, M.R., and Sherwood, D.R. (2015). Basement Membranes in the Worm: A Dynamic  
632 Scaffolding that Instructs Cellular Behaviors and Shapes Tissues. *Curr. Top. Membr.* 76, 337–  
633 371.
- 634 Cochran, W.G. (1954). Some Methods for Strengthening the Common  $\chi^2$  Tests. *Biometrics* 10,  
635 417–451.
- 636 Crittenden, S.L., Troemel, E.R., Evans, T.C., and Kimble, J. (1994). GLP-1 is localized to the  
637 mitotic region of the *C. elegans* germ line. *Dev. Camb. Engl.* 120, 2901–2911.
- 638 Crittenden, S.L., Leonhard, K.A., Byrd, D.T., and Kimble, J. (2006). Cellular analyses of the  
639 mitotic region in the *Caenorhabditis elegans* adult germ line. *Mol. Biol. Cell* 17, 3051–3061.

- 640 Crittenden, S.L., Seidel, H.S., and Kimble, J. (2017). Analysis of the *C. elegans* Germline Stem  
641 Cell Pool. *Methods Mol. Biol.* Clifton NJ *1463*, 1–33.
- 642 Eckmann, C.R., Crittenden, S.L., Suh, N., and Kimble, J. (2004). GLD-3 and control of the  
643 mitosis/meiosis decision in the germline of *Caenorhabditis elegans*. *Genetics* *168*, 147–160.
- 644 Fang, Q., and Boas, D. (2009). Tetrahedral mesh generation from volumetric binary and gray-  
645 scale images. *Proceedings of IEEE International Symposium on Biomedical Imaging* 1142–  
646 1145.
- 647 van der Flier, L.G., and Clevers, H. (2009). Stem Cells, Self-Renewal, and Differentiation in the  
648 Intestinal Epithelium. In *Annual Review of Physiology*, (Palo Alto: Annual Reviews), pp. 241–  
649 260.
- 650 Fox, P.M., and Schedl, T. (2015). Analysis of Germline Stem Cell Differentiation Following Loss  
651 of GLP-1 Notch Activity in *Caenorhabditis elegans*. *Genetics* *201*, 167–184.
- 652 Fox, P.M., Vought, V.E., Hanazawa, M., Lee, M.-H., Maine, E.M., and Schedl, T. (2011). Cyclin  
653 E and CDK-2 regulate proliferative cell fate and cell cycle progression in the *C. elegans*  
654 germline. *Dev. Camb. Engl.* *138*, 2223–2234.
- 655 Fuller, M.T., and Spradling, A.C. (2007). Male and female *Drosophila* germline stem cells: Two  
656 versions of immortality. *Science* *316*, 402–404.
- 657 Goupil, E., Amini, R., Hall, D.H., and Labbé, J.-C. (2017). Actomyosin contractility regulators  
658 stabilize the cytoplasmic bridge between the two primordial germ cells during *C. elegans*  
659 embryogenesis. *Mol. Biol. Cell*.
- 660 Greenbaum, M.P., Iwamori, T., Buchold, G.M., and Matzuk, M.M. (2011). Germ cell intercellular  
661 bridges. *Cold Spring Harb. Perspect. Biol.* *3*, a005850.
- 662 Hadwiger, G., Dour, S., Arur, S., Fox, P., and Nonet, M.L. (2010). A Monoclonal Antibody  
663 Toolkit for *C. elegans*. *PLOS ONE* *5*, e10161.
- 664 Haglund, K., Nezis, I.P., and Stenmark, H. (2011). Structure and functions of stable intercellular  
665 bridges formed by incomplete cytokinesis during development. *Commun. Integr. Biol.* *4*, 1–9.
- 666 Ihara, S., Hagedorn, E.J., Morrissey, M.A., Chi, Q., Motegi, F., Kramer, J.M., and Sherwood,  
667 D.R. (2011). Basement Membrane Sliding and Targeted Adhesion Remodels Tissue  
668 Boundaries During Uterine-vulval Attachment in *C. elegans*. *Nat. Cell Biol.* *13*, 641–651.
- 669 Inaba, M., Buszczak, M., and Yamashita, Y.M. (2015). Nanotubes mediate niche-stem cell  
670 signaling in the *Drosophila* testis. *Nature* *523*, 329–332.
- 671 Jones, A.R., Francis, R., and Schedl, T. (1996). GLD-1, a cytoplasmic protein essential for  
672 oocyte differentiation, shows stage- and sex-specific expression during *Caenorhabditis elegans*  
673 germline development. *Dev. Biol.* *180*, 165–183.

- 674 Kachur, T.M., Audhya, A., and Pilgrim, D.B. (2008). UNC-45 is required for NMY-2 contractile  
675 function in early embryonic polarity establishment and germline cellularization in *C. elegans*.  
676 *Dev. Biol.* 314, 287–299.
- 677 Kershner, A., Crittenden, S.L., Friend, K., Sorensen, E.B., Porter, D.F., and Kimble, J. (2013).  
678 Germline stem cells and their regulation in the nematode *Caenorhabditis elegans*. *Adv. Exp.*  
679 *Med. Biol.* 786, 29–46.
- 680 Kershner, A.M., Shin, H., Hansen, T.J., and Kimble, J. (2014). Discovery of two GLP-1/Notch  
681 target genes that account for the role of GLP-1/Notch signaling in stem cell maintenance. *Proc.*  
682 *Natl. Acad. Sci. U. S. A.* 111, 3739–3744.
- 683 Kimble, J., and Crittenden, S.L. (2005). Germline proliferation and its control. *WormBook Online*  
684 *Rev. C Elegans Biol.* 1–14.
- 685 Kimble, J., and Seidel, H. (2013). *C. elegans* germline stem cells and their niche. In *StemBook*,  
686 (Cambridge (MA): Harvard Stem Cell Institute), p.
- 687 Kimble, J.E., and White, J.G. (1981). On the control of germ cell development in *Caenorhabditis*  
688 *elegans*. *Dev. Biol.* 81, 208–219.
- 689 Korčeková, D., Gombitová, A., Raška, I., Cmarko, D., and Lanctôt, C. (2012). Nucleologenesis  
690 in the *Caenorhabditis elegans* embryo. *PLoS One* 7, e40290.
- 691 Kramer, J.M. (2005). Basement membranes. *WormBook Online Rev. C Elegans Biol.* 1–15.
- 692 Lee, C., Sorensen, E.B., Lynch, T.R., and Kimble, J. (2016). *C. elegans* GLP-1/Notch activates  
693 transcription in a probability gradient across the germline stem cell pool. *ELife* 5.
- 694 Lee, K.-Y., Green, R.A., Gutierrez, E., Gomez-Cavazos, J.S., Kolotuev, I., Wang, S., Desai, A.,  
695 Groisman, A., and Oegema, K. (2017). CYK-4 functions independently of its centralspindlin  
696 partner ZEN-4 to cellularize oocytes in germline syncytia. *BioRxiv*.
- 697 Linden, L.M., Gordon, K.L., Pani, A.M., Payne, S.G., Garde, A., Burkholder, D., Chi, Q.,  
698 Goldstein, B., and Sherwood, D.R. (2017). Identification of regulators of germ stem cell  
699 envelopment by its niche in *C. elegans*. *Dev. Biol.* 429, 271–284.
- 700 Maddox, A.S., Habermann, B., Desai, A., and Oegema, K. (2005). Distinct roles for two *C.*  
701 *elegans* anillins in the gonad and early embryo. *Dev. Camb. Engl.* 132, 2837–2848.
- 702 Matova, N., and Cooley, L. (2001). Comparative aspects of animal oogenesis. *Dev. Biol.* 231,  
703 291–320.
- 704 Morgan, D.E., Crittenden, S.L., and Kimble, J. (2010). The *C. elegans* adult male germline: stem  
705 cells and sexual dimorphism. *Dev. Biol.* 346, 204–214.
- 706 Nelson, C.M. (2016). On Buckling Morphogenesis. *J. Biomech. Eng.-Trans. Asme* 138, 021005.

- 707 Pearl, E.J., Li, J., and Green, J.B.A. (2017). Cellular systems for epithelial invagination. *Phil*  
708 *Trans R Soc B* 372, 20150526.
- 709 Rehain-Bell, K., Love, A., Werner, M.E., MacLeod, I., Yates, J.R., and Maddox, A.S. (2017). A  
710 Sterile 20 Family Kinase and Its Co-factor CCM-3 Regulate Contractile Ring Proteins on  
711 Germline Intercellular Bridges. *Curr. Biol.* 27, 860–867.
- 712 Rosu, S., and Cohen-Fix, O. (2017). Live-imaging analysis of germ cell proliferation in the *C.*  
713 *elegans* adult supports a stochastic model for stem cell proliferation. *Dev. Biol.* 423, 93–100.
- 714 Roy, D., Michaelson, D., Hochman, T., Santella, A., Bao, Z., Goldberg, J.D., and Hubbard,  
715 E.J.A. (2016). Cell cycle features of *C. elegans* germline stem/progenitor cells vary temporally  
716 and spatially. *Dev. Biol.* 409, 261–271.
- 717 Scheres, B. (2007). Stem-cell niches: nursery rhymes across kingdoms. *Nat. Rev. Mol. Cell*  
718 *Biol.* 8, 345–354.
- 719 Schumacher, B., Hanazawa, M., Lee, M.-H., Nayak, S., Volkmann, K., Hofmann, R.,  
720 Hengartner, M., Schedl, T., and Gartner, A. (2005). Translational Repression of *C. elegans* p53  
721 by GLD-1 Regulates DNA Damage-Induced Apoptosis. *Cell* 120, 357–368.
- 722 Seidel, H.S., and Kimble, J. (2015). Cell-cycle quiescence maintains *Caenorhabditis elegans*  
723 germline stem cells independent of GLP-1/Notch. *ELife* 4, e10832.
- 724 Shin, H., Haupt, K.A., Kershner, A.M., Kroll-Conner, P., Wickens, M., and Kimble, J. (2017).  
725 SYGL-1 and LST-1 link niche signaling to PUF RNA repression for stem cell maintenance in  
726 *Caenorhabditis elegans*. *PLoS Genet.* 13, e1007121.
- 727 Starich, T.A., Hall, D.H., and Greenstein, D. (2014). Two classes of gap junction channels  
728 mediate soma-germline interactions essential for germline proliferation and gametogenesis in  
729 *Caenorhabditis elegans*. *Genetics* 198, 1127–1153.
- 730 Swiatek, P., Kubrakiewicz, J., and Klag, J. (2009). Formation of germ-line cysts with a central  
731 cytoplasmic core is accompanied by specific orientation of mitotic spindles and partitioning of  
732 existing intercellular bridges. *Cell Tissue Res.* 337, 137–148.
- 733 Taber, L.A. (2014). Morphomechanics: transforming tubes into organs. *Curr. Opin. Genet. Dev.*  
734 27, 7–13.
- 735 Urbisz, A.Z., Chajec, Ł., and Świątek, P. (2015). The Ovary of *Tubifex tubifex* (Clitellata,  
736 Naididae, Tubificinae) Is Composed of One, Huge Germ-Line Cyst that Is Enriched with  
737 Cytoskeletal Components. *PloS One* 10, e0126173.
- 738 Waters, J.C. (2009). Accuracy and precision in quantitative fluorescence microscopy. *J. Cell*  
739 *Biol.* 185, 1135–1148.
- 740 Yamashita, Y.M., and Fuller, M.T. (2008). Asymmetric centrosome behavior and the  
741 mechanisms of stem cell division. *J. Cell Biol.* 180, 261–266.

742 Yang, H., Adam, R.C., Ge, Y., Hua, Z.L., and Fuchs, E. (2017). Epithelial-Mesenchymal Micro-  
743 niches Govern Stem Cell Lineage Choices. *Cell* 169, 483-496.e13.

744 Zhou, K., Rolls, M.M., and Hanna-Rose, W. (2013). A postmitotic function and distinct  
745 localization mechanism for centralspindlin at a stable intercellular bridge. *Dev. Biol.* 376, 13–22.

746



747 **Table 1. Ring-channel configuration throughout the cell cycle.**

| Cell-cycle stage | % of germ cells with 'open' ring-channel (n) |           |
|------------------|----------------------------------------------|-----------|
|                  | Hermaphrodite                                | Male      |
| Interphase       | 98% (211)                                    | 98% (101) |
| Prophase         | 0% (76)                                      | 0% (29)   |
| Metaphase        | 0% (43)                                      | 0% (21)   |
| Anaphase         | 0% (25)                                      | 0% (24)   |
| Telophase        | 0% (54)                                      | 0% (29)   |

748

749 **Table 2. Incidence of GLD-1 steps relative to germline folds.**

| GLD-1 visualization | Sex           | % of GLD-1 steps coincident with folds | No. of GLD-1 steps | No. of prog. zones |
|---------------------|---------------|----------------------------------------|--------------------|--------------------|
| GLD-1::GFP          | Hermaphrodite | 100%                                   | 112                | 59                 |
| Anti-GLD-1          | Hermaphrodite | 100%                                   | 59                 | 31                 |
| Anti-GLD-1          | Male, unmated | 100%                                   | 18                 | 16                 |

750

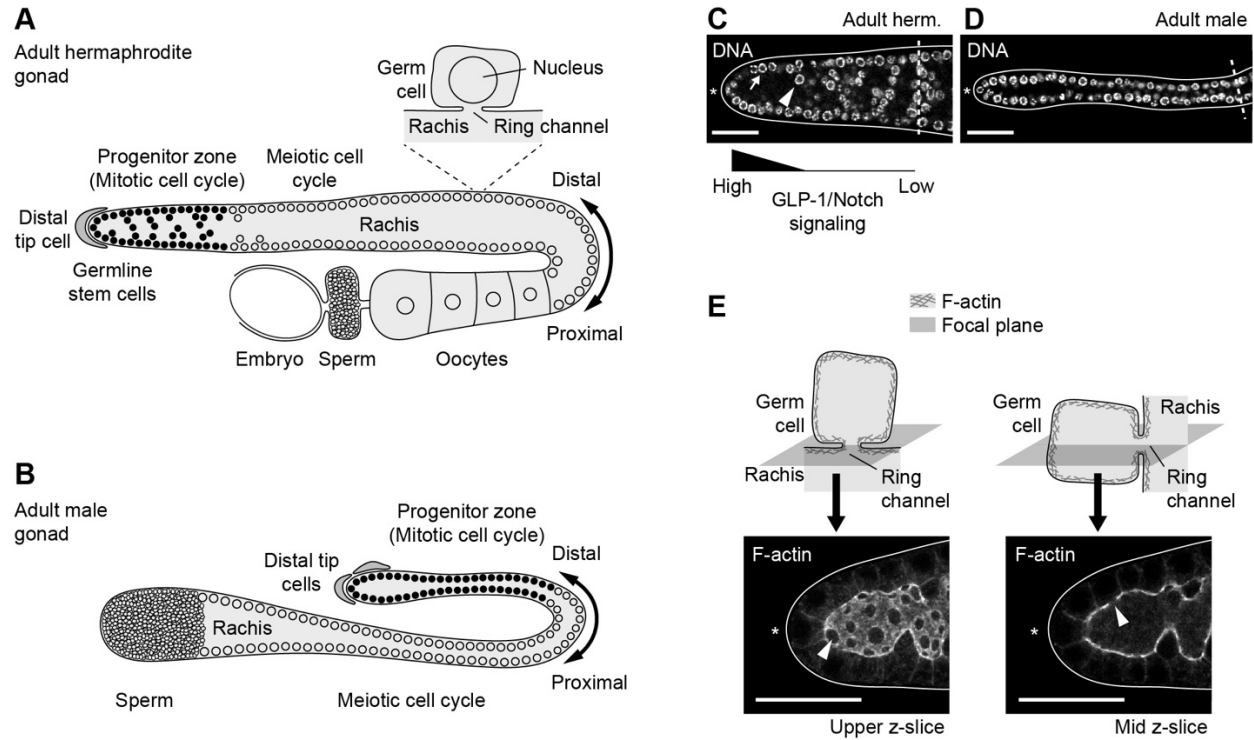

751 **Figure 1. Anatomy of the *C. elegans* gonad.**

752 (A) Adult hermaphrodite gonad. (B) Adult male gonad. (C-D) Progenitor zones stained for DNA.  
 753 Dashed line, boundary of progenitor zone. Arrow, example of germ cell nucleus on the outer  
 754 surface of the progenitor zone. Arrowhead, example of germ cell nucleus in the interior of the  
 755 progenitor zone. (E) Ring channels visualized by F-actin. Top, orientation of focal plane relative  
 756 to ring channel. Bottom, adult hermaphrodite progenitor zone stained for F-actin. Arrowhead,  
 757 ring channel. (C-E) Scale bar, 20  $\mu\text{m}$ .

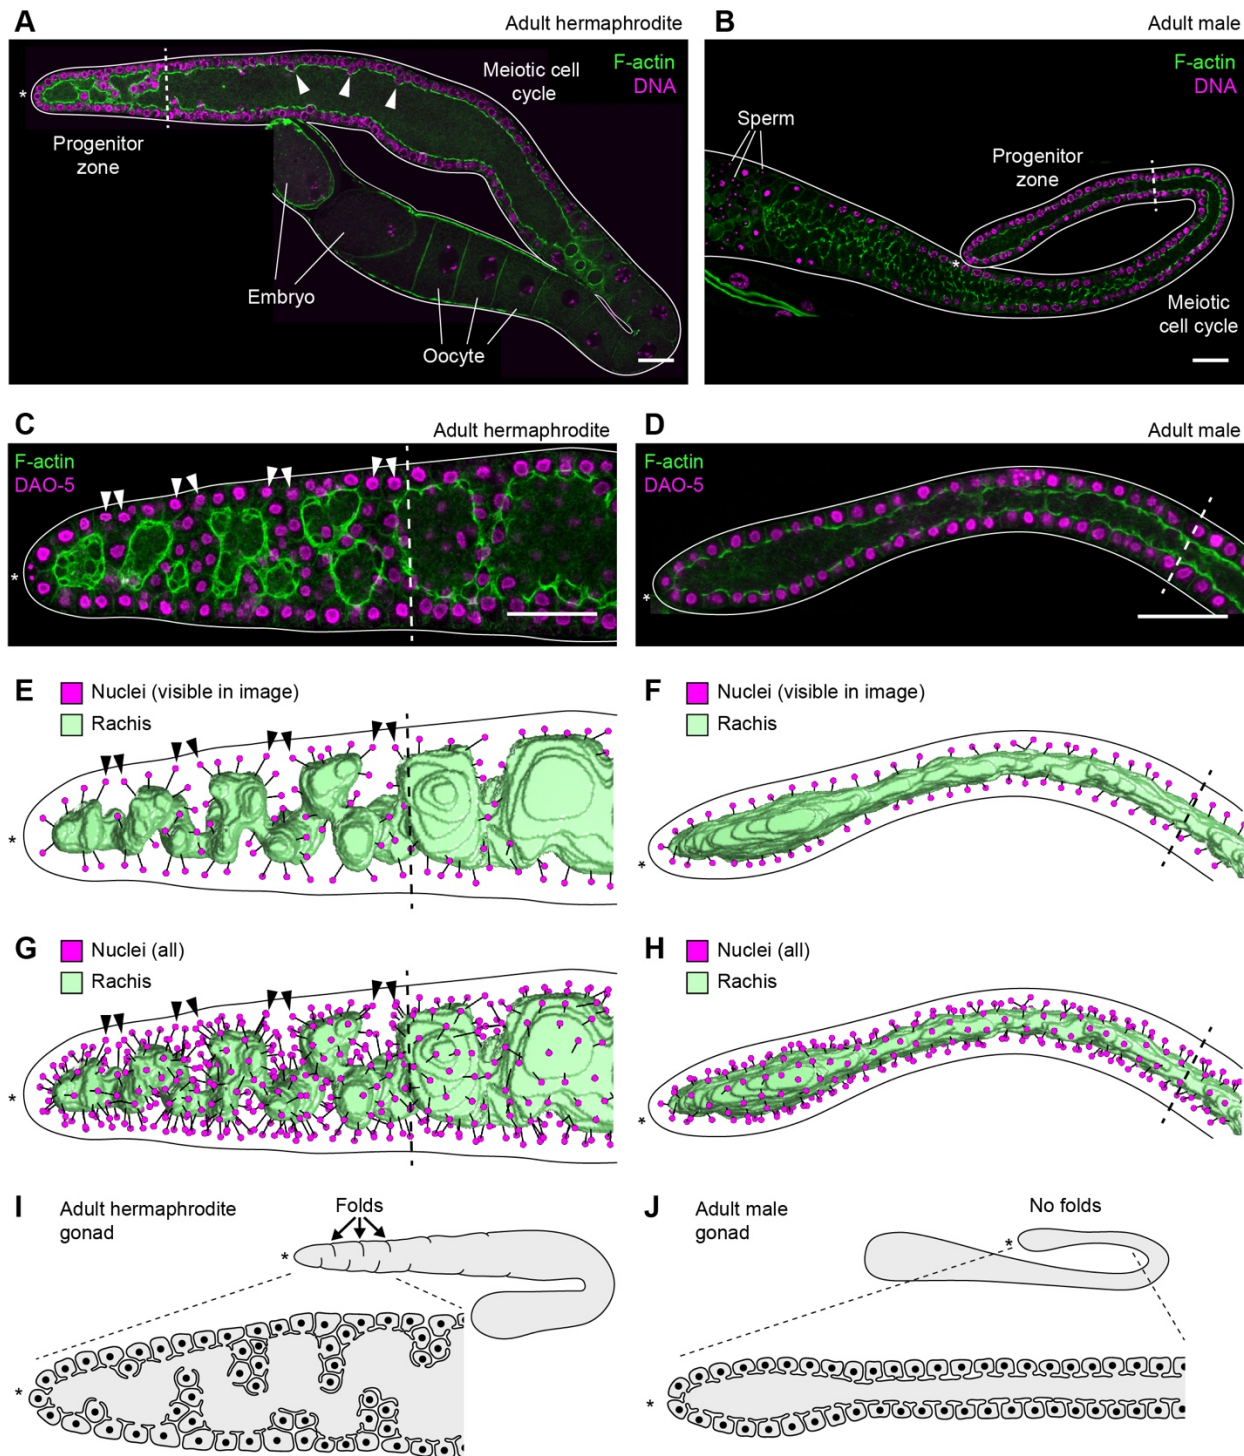

758 **Figure 2. Adult progenitor zones are folded in hermaphrodites but not in males.**  
 759 (A-B) Adult gonads stained for F-actin and DNA. Images are composites of two or three fields of  
 760 view. Arrowhead, example of shallow germline fold in the meiotic region of the gonad. (C-D) Adult  
 761 progenitor zones stained for F-actin and DAO-5. Images are maximum-intensity z-projections  
 762 through a z-range of 1.5  $\mu$ m. Arrowhead, pair of germ cells flanking a germline fold. (A-D) Scale  
 763 bar, 20  $\mu$ m. (E-H) Models of rachis and germ cell nuclei. Black lines, connections between germ

764 cell nuclei and their respective ring channels. (A-H) Solid line, outline of gonad. Dashed line,  
765 boundary of progenitor zone. Asterisk, distal end of gonad. (I-J) Schematic of progenitor-zone  
766 architecture.

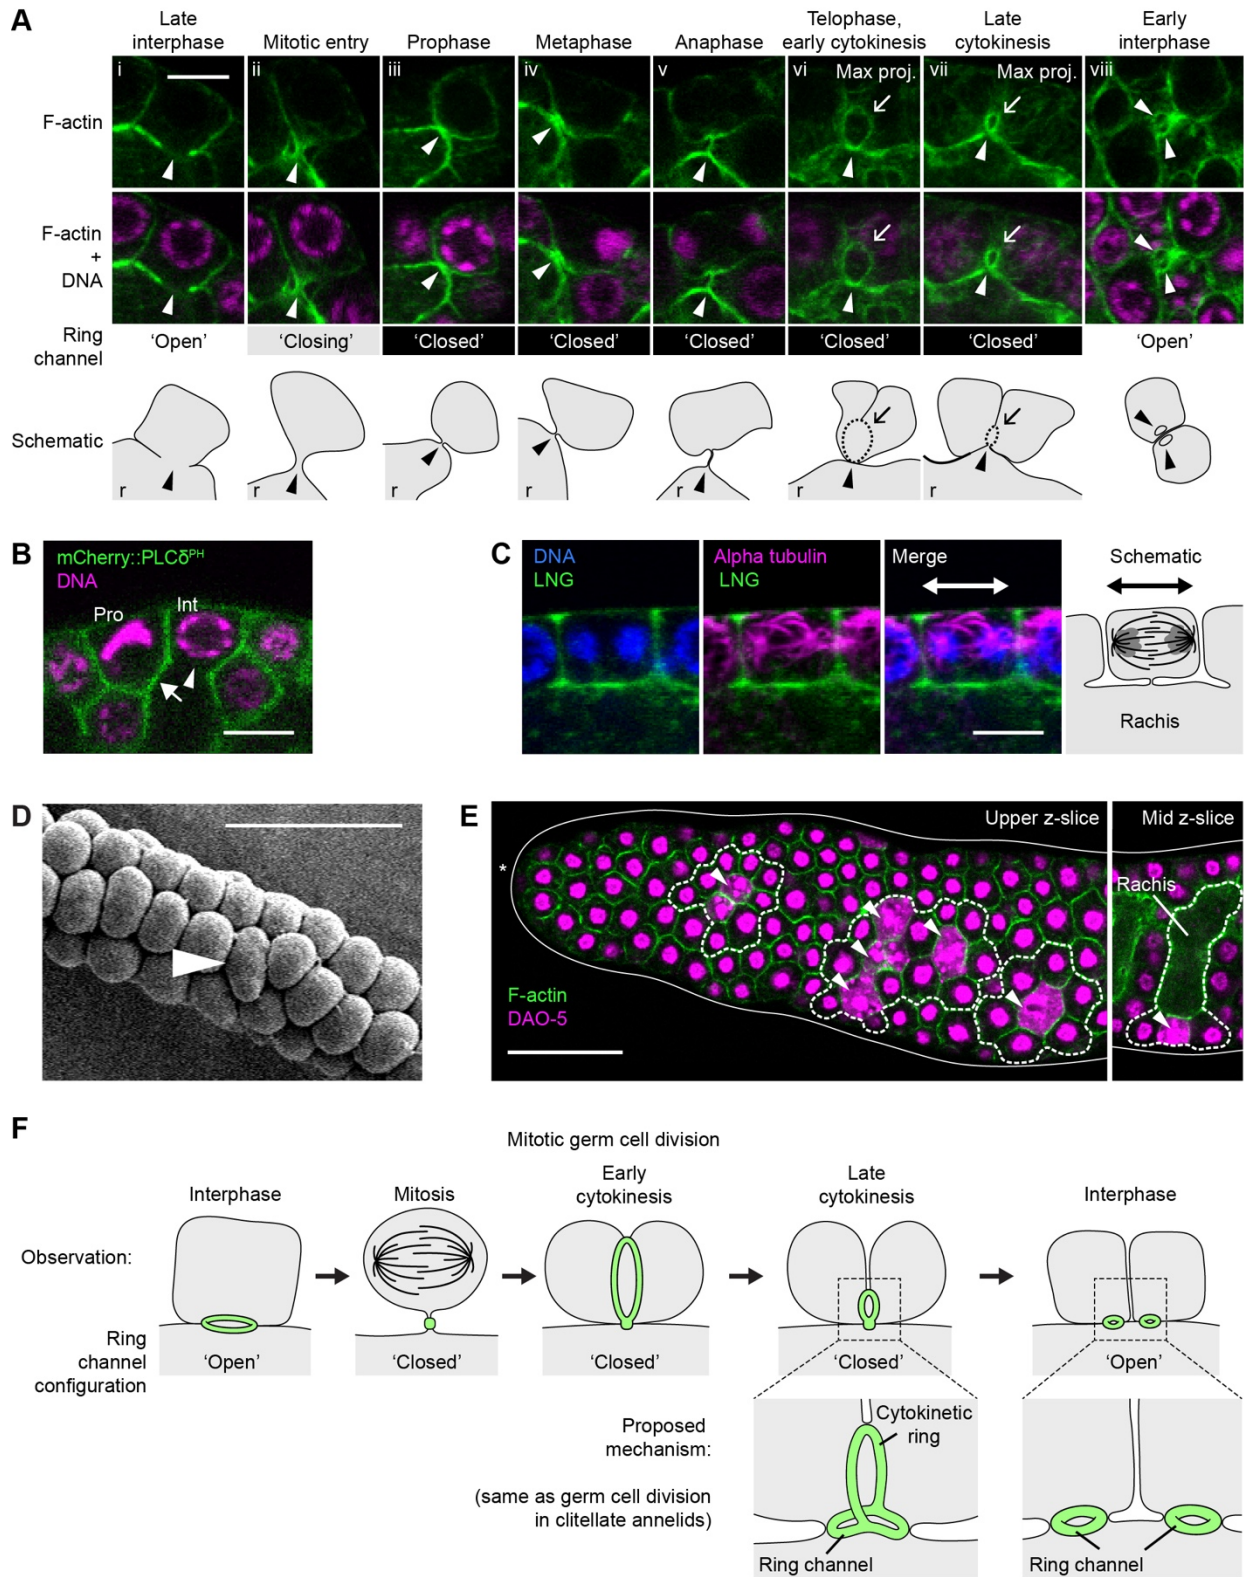

767 **Figure 3. Germ cell architecture during mitotic division.**  
 768 (A) Germ cells stained for F-actin and DNA. Arrowhead, ring channel. Arrow, cytokinetic ring. Max  
 769 proj, maximum-intensity z-projection through a z-range of 1.8  $\mu\text{m}$ . r, rachis. (B) Germ cells

770 expressing mCherry::PLC $\delta^{\text{PH}}$  and stained for DNA. Pro, prophase. Int, interphase. Arrowhead,  
771 'open' ring channel. Arrow, 'closed' ring channel. (C) Germ cell stained for alpha-tubulin, DNA,  
772 and the LNG repeats of GLP-1 (to mark plasma membranes). (A-C) Scale bar, 5  $\mu\text{m}$ . (D) Adult  
773 male progenitor zone imaged using scanning electron microscopy. Arrowhead, dividing germ cell.  
774 The face of the rachis must be immediately beneath the dividing germ cell, given that this  
775 progenitor zone comes from a male. (E) Adult hermaphrodite progenitor zone stained for F-actin  
776 and DAO-5. Left, upper z-slice (rachis not visible). Right, mid z-slice (rachis visible). Solid line,  
777 outline of gonad. Asterisk, distal end of gonad. Area enclosed by dashed line, M-phase cells,  
778 adjoining germ cells, and adjoining regions of the rachis. Arrowhead, M-phase cell. Stages of M-  
779 phase cells from left to right: telophase, anaphase, telophase, metaphase, anaphase, metaphase,  
780 anaphase. (D-E) Scale bar, 20  $\mu\text{m}$ . (F) Schematic of mitotic germ cell division. The proposed  
781 mechanism is the same as germ cell division in clitellate annelids (Swiatek et al., 2009).

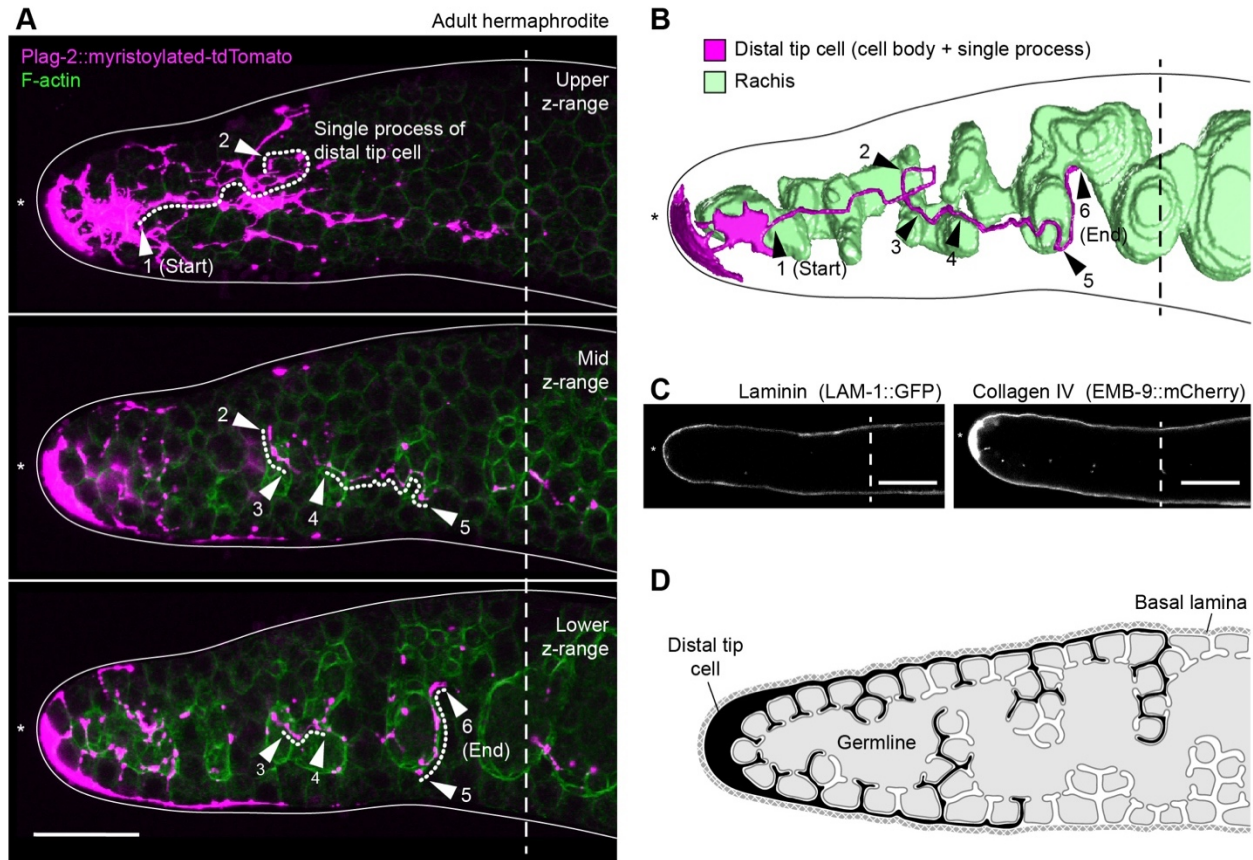

782 **Figure 4. Processes of the distal tip cell extend into germline folds.**

783 (A) Adult hermaphrodite progenitor zone stained for F-actin and expressing myristoylated-  
 784 tdTomato in the distal tip cell. Images are maximum-intensity z-projections through a z-range of  
 785 2.1  $\mu\text{m}$ . Solid line, outline of gonad. Dotted line, single process of the distal tip cell. Arrowheads,  
 786 positional markers. (B) Model of rachis and distal tip cell. (C) Adult hermaphrodite progenitor  
 787 zones expressing LAM-1::GFP or EMB-9::mCherry. (A-C) Dashed line, boundary of progenitor  
 788 zone. Asterisk, distal end of gonad. Scale bar, 20  $\mu\text{m}$ . (E) Schematic of distal tip cell and basal  
 789 lamina in the adult hermaphrodite progenitor zone.

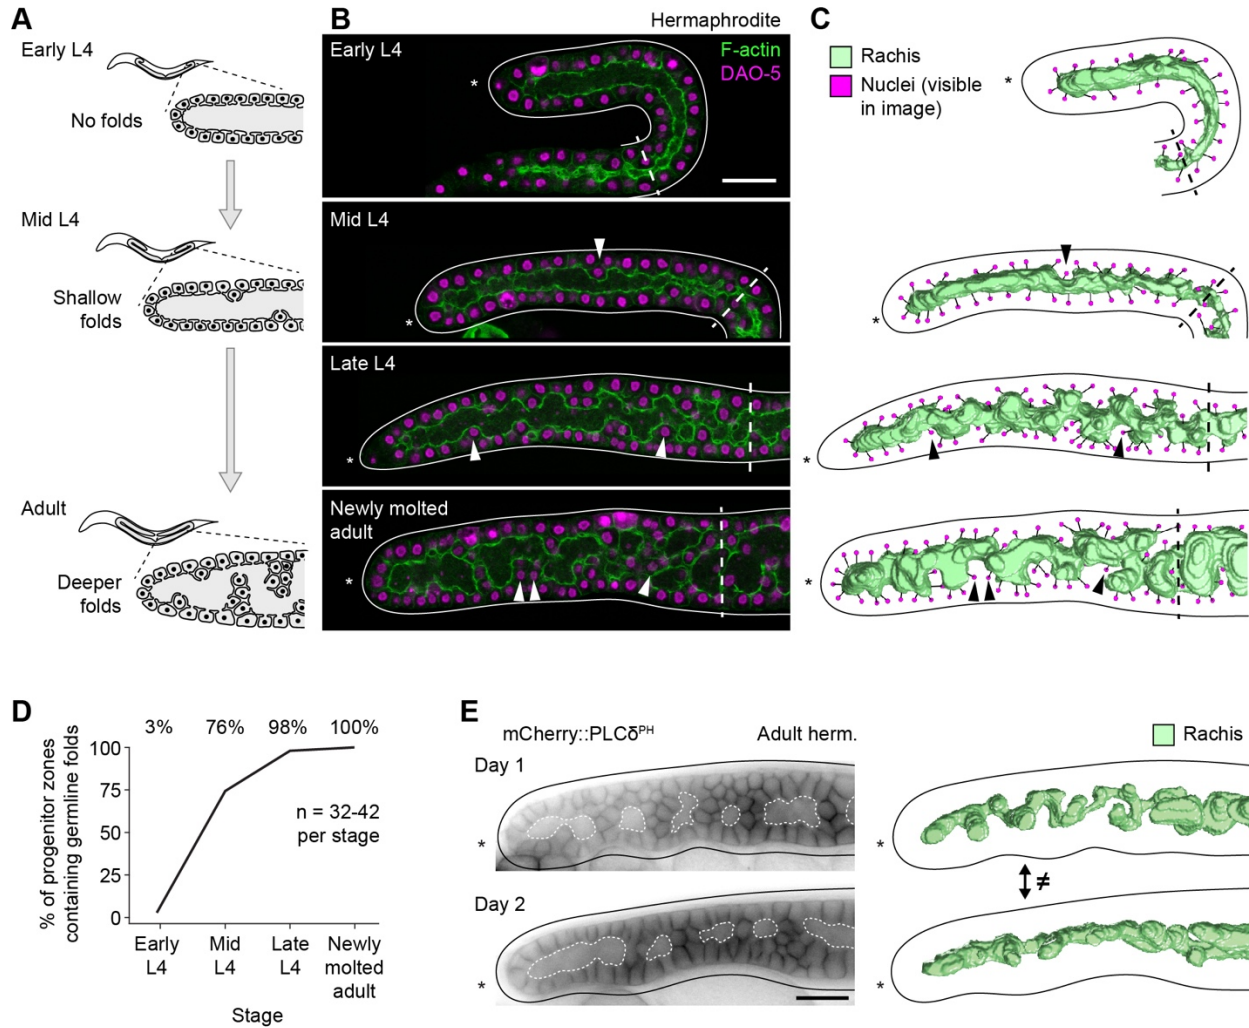

790 **Figure 5. Germline folds begin during the L4 larval stage and change over time.**  
 791 (A) Schematic of germline development in L4 and adult hermaphrodites, summarizing findings of  
 792 the current study. (B) Progenitor zones in L4 and newly molted adult hermaphrodites, stained for  
 793 F-actin and DAO-5. Images are maximum-intensity z-projections through a z-range of 1.5  $\mu\text{m}$ . (C)  
 794 Models of rachis and germ cell nuclei. Black lines, connections between germ cell nuclei and their  
 795 respective ring channels. (B-C) Arrowhead, example of germ cell positioned within a germline  
 796 fold. Dashed line, boundary of progenitor zone. (D) Incidence of germline folds in L4s and newly  
 797 molted adults. (E) Left, adult hermaphrodite progenitor zone expressing mCherry::PLC $\delta^{\text{PH}}$ .  
 798 Images have been processed with background subtraction. Dashed white line, rachis. Right,  
 799 models of rachis. (B-C, E) Solid line, outline of gonad. Asterisk, distal end of gonad. Scale bar, 20  
 800  $\mu\text{m}$ .



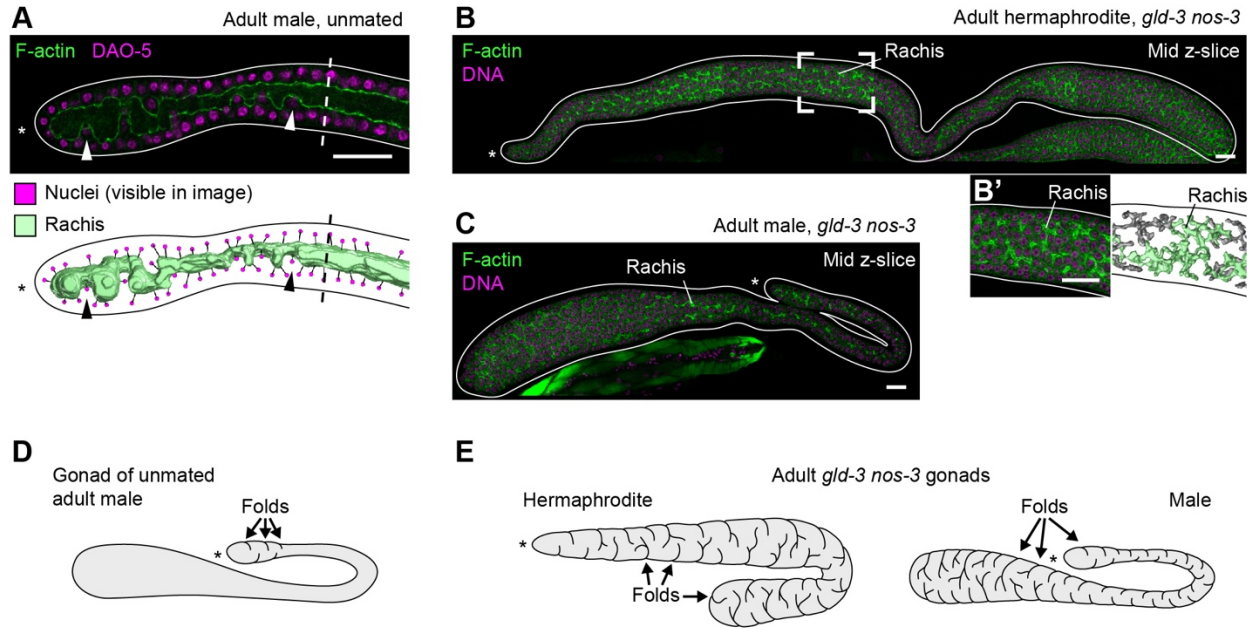

801 **Figure 6. Germline folds can be induced under conditions of germ cell crowding.**

802 (A) Top, progenitor zone of unemated adult male, stained for F-actin and DAO-5. Image is  
 803 maximum-intensity z-projection through a z-range of 1.5  $\mu\text{m}$ . Arrowhead, example of germ cell  
 804 positioned within a germline fold. Dashed line, boundary of progenitor zone. Bottom, model of  
 805 rachis and germ cell nuclei. Black lines, connections between germ cell nuclei and their respective  
 806 ring channels. (B-C) Gonads of *gld-3(q730) nos-3(q650)* adults stained for F-actin and DNA.  
 807 Images are composites of three or four fields of view. (B') Left, focal region marked in (B). Right,  
 808 model of rachis. Green, regions of rachis contiguous within the field of view. Gray, regions of the  
 809 rachis contiguous outside the field of view. (A-C) Solid line, outline of gonad. Asterisk, distal end  
 810 of gonad. Scale bar, 20  $\mu\text{m}$ . (D-E) Schematic of germline folds in unemated adult male and *gld-3*  
 811 *nos-3* adults of both sexes.

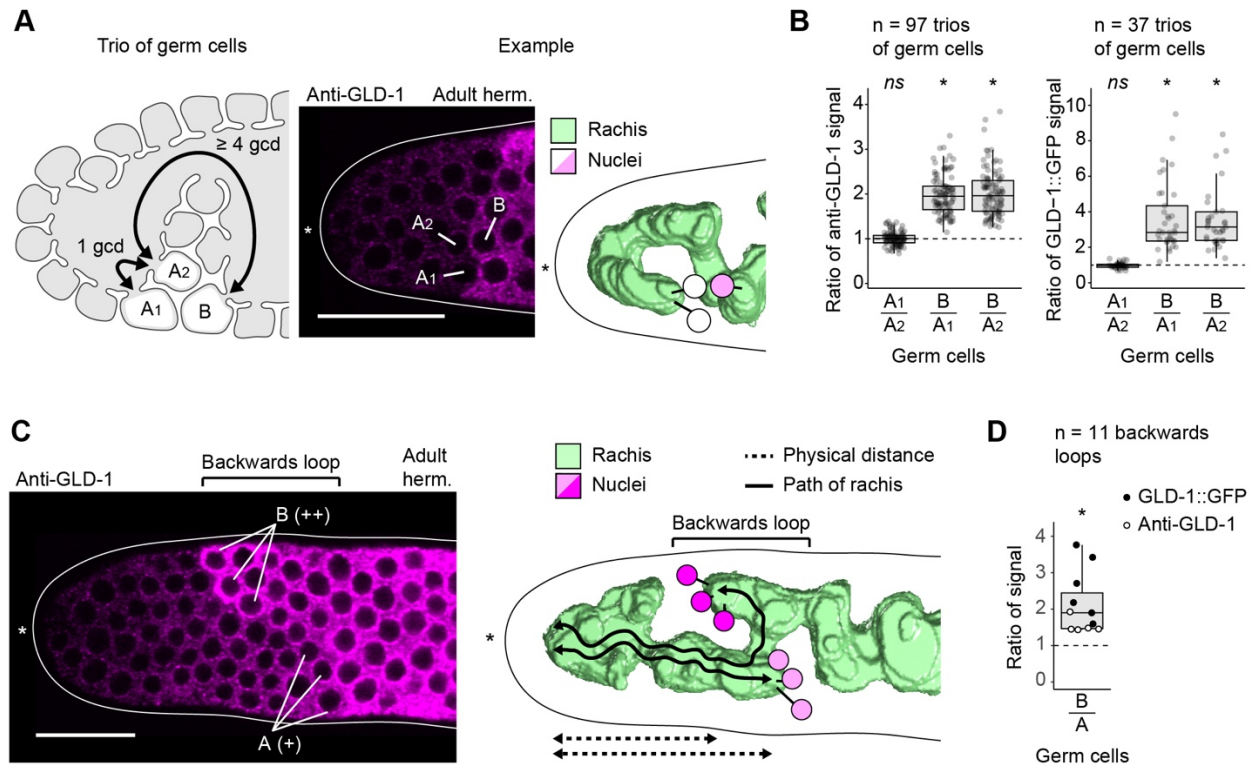

812 **Figure 7. GLD-1 levels increase along the path of the rachis.**

813 (A) Left, schematic of germ cell trio used for quantification of GLD-1. gcd, germ cell diameter.  
 814 Center, adult hermaphrodite progenitor zone stained for GLD-1. Right, model of rachis and germ  
 815 cell nuclei. (B) Quantification of GLD-1 in germ cell trios. (C) Left, adult hermaphrodite progenitor  
 816 zone stained for GLD-1 and containing a backwards loop. + and ++, relative levels of GLD-1.  
 817 Right, model of rachis and germ cell nuclei. (D) Quantification of GLD-1 in germ cells along  
 818 backwards loops. (A, C) Solid line, outline of gonad. Asterisk, distal end of gonad. Black lines in  
 819 models, connections between germ cell nuclei and their respective ring channels. Scale bar, 20  
 820  $\mu$ m. (B, D) Boxplots: center bar, median; box, interquartile range (IQR); whiskers, most extreme  
 821 value within 1.5\*IQR from box. dashed line, ratio of 1. ns, p > 0.05, paired t-test of GLD-1 levels  
 822 in A<sub>1</sub> versus A<sub>2</sub>. \*, p < 0.01, paired t-test of GLD-1 levels in B versus A<sub>1</sub>, A<sub>2</sub>, or A.

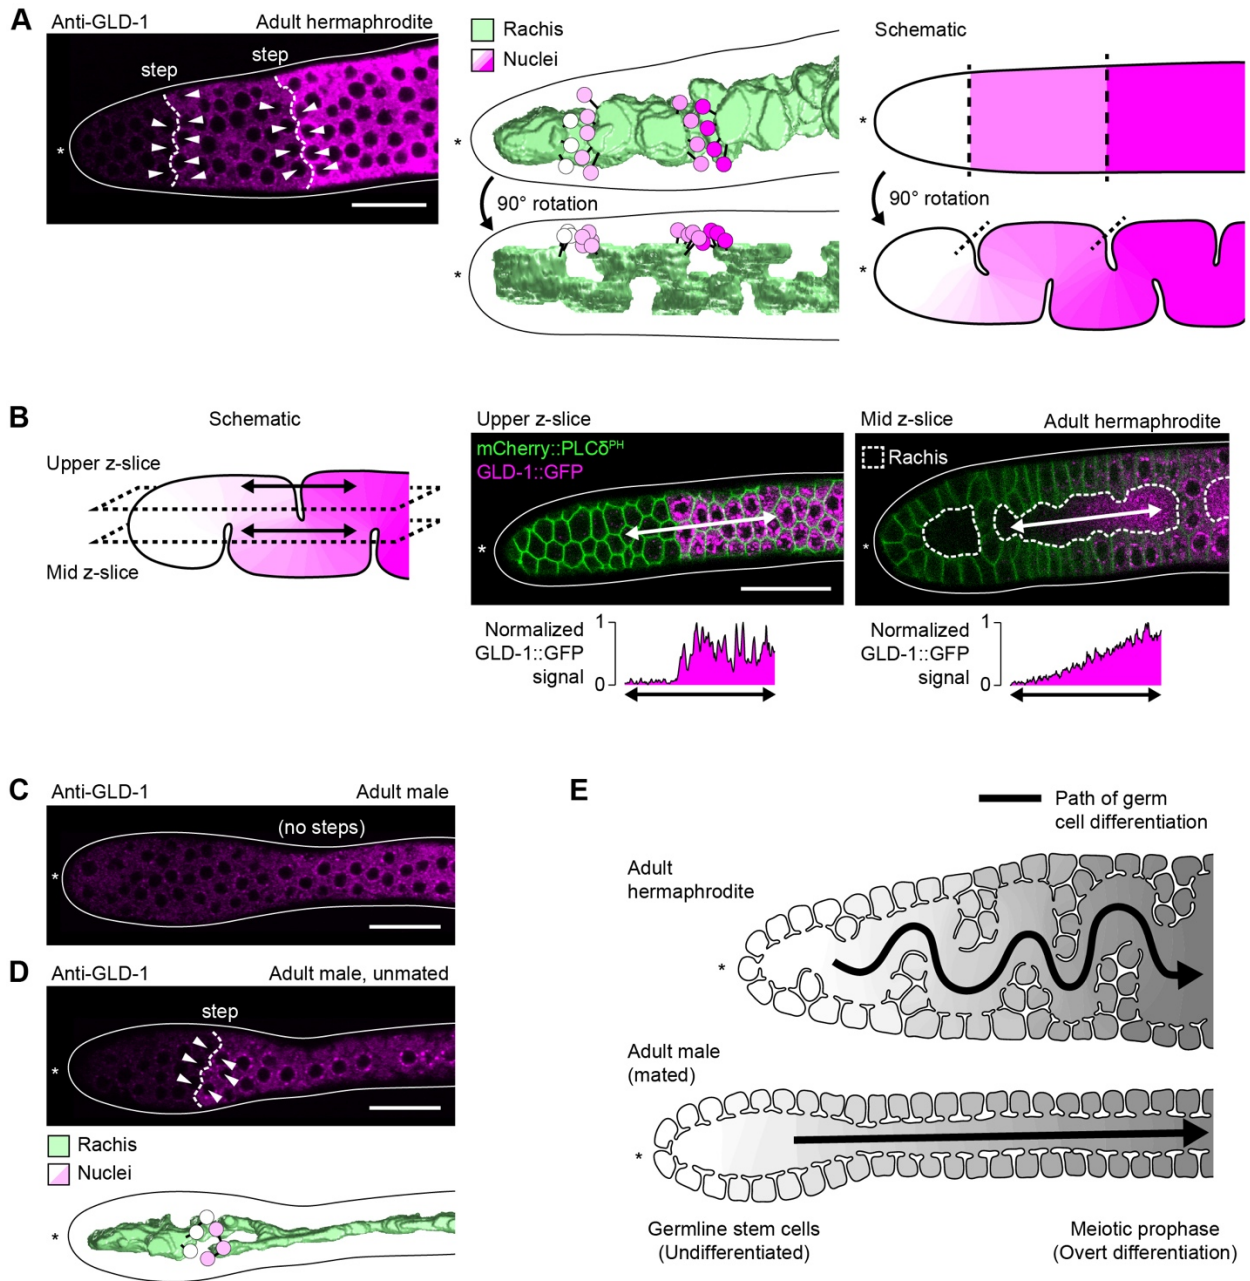

823 **Figure 8. Germline folds create the illusion of abrupt changes in GLD-1 expression levels.**  
 824 (A) Example of GLD-1 steps. Left, adult hermaphrodite progenitor zone stained for GLD-1. Center,  
 825 model of rachis and germ cell nuclei. Right, schematic of germline folds. (B) Center and right,  
 826 adult hermaphrodite progenitor zone expressing GLD-1::GFP and mCherry::PLC $\delta^{\text{PH}}$ .  
 827 Bidirectional arrow, axis of GLD-1::GFP quantification. GLD-1::GFP levels were quantified across  
 828 germline fold (center) and along the path of the rachis (right). Left, schematic of germline folds in  
 829 the progenitor zone shown center and right. (C) Progenitor zone of adult male grown under  
 830 standard laboratory conditions and stained for GLD-1. (D) Top, progenitor zone of adult male  
 831 prevented from mating for two days and stained for GLD-1. Bottom, model of rachis and germ cell  
 832 nuclei. (A-D) Solid line, outline of gonad. Asterisk, distal end of gonad. Scale bar, 20  $\mu\text{m}$ . (A, D)  
 833 Dashed line, GLD-1 step. Arrowhead, germ cell included in model. Black lines in models,

834 connections between germ cell nuclei and their respective ring channels. (E) Model for germ cell  
835 differentiation progressing along the path of the rachis.

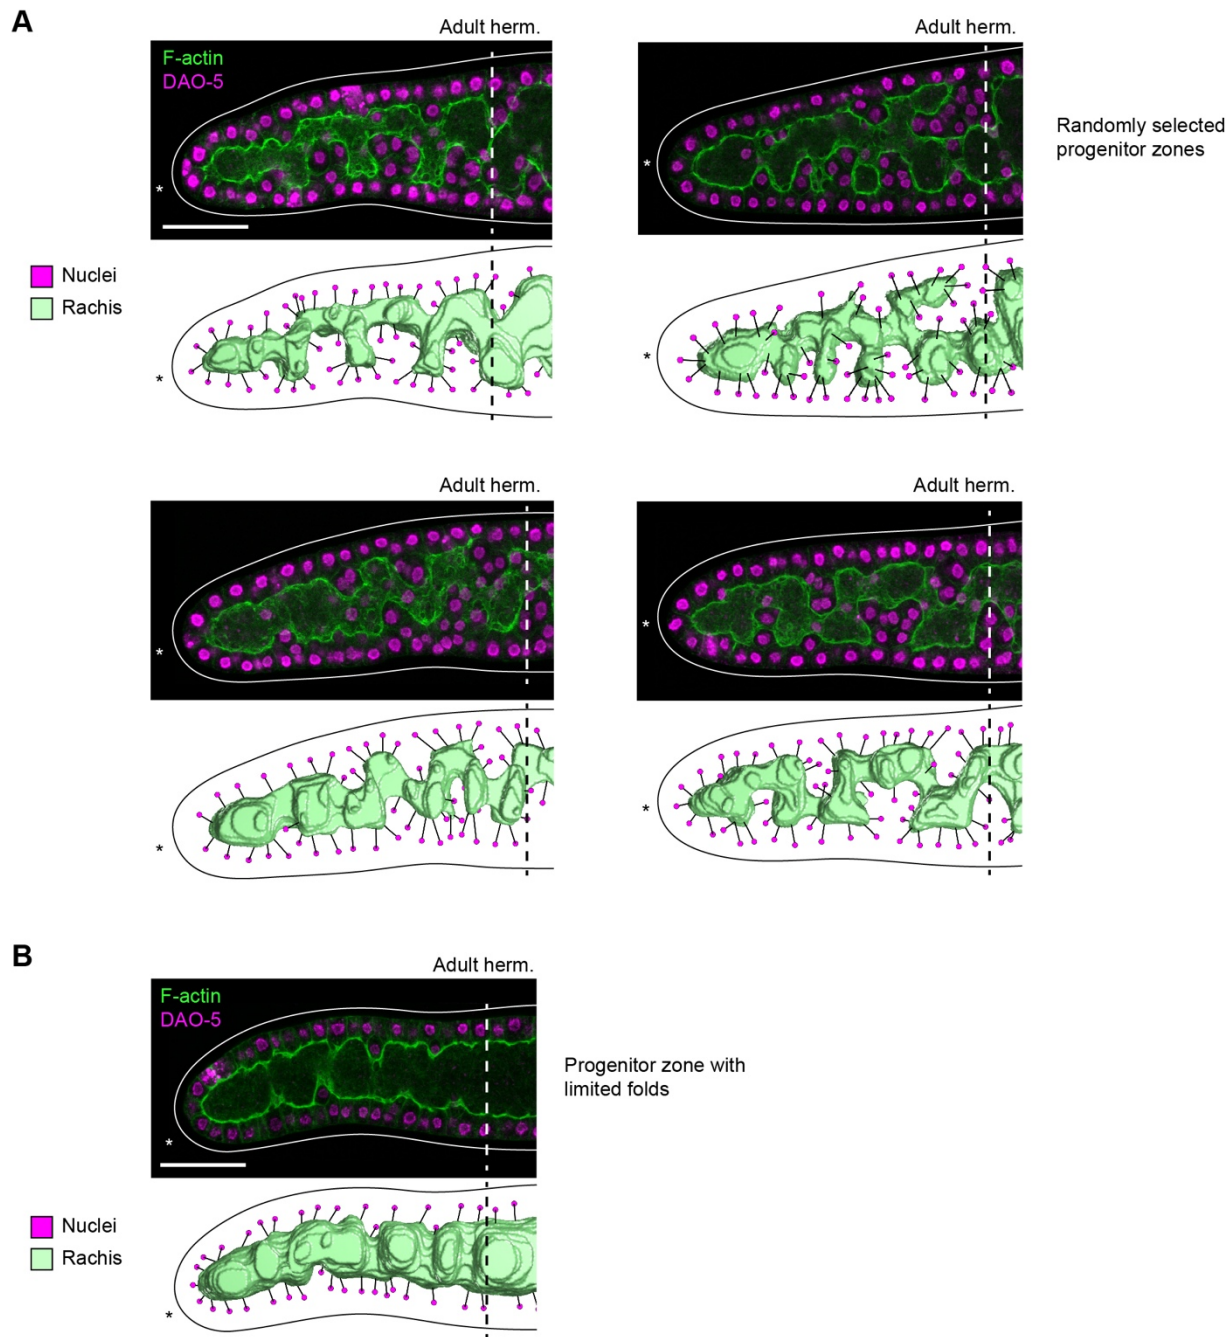

836 **Figure S1. Additional examples of adult hermaphrodite progenitor zones.**

837 Top of each pair, adult hermaphrodite progenitor zone stained for F-actin and DAO-5. Bottom of  
 838 each pair, model of rachis and germ cell nuclei. Images are maximum-intensity z-projections  
 839 through a z-range of 1.5  $\mu\text{m}$ . Models include only germ cell nuclei visible in images. Solid line,  
 840 outline of gonad. Dashed line, boundary of progenitor zone. Asterisk, distal end of gonad. Black  
 841 lines in models, connections between germ cell nuclei and their respective ring channels. Scale  
 842 bar, 20  $\mu\text{m}$ . (A) Randomly selected examples. (B) Example of progenitor zone with limited folding.

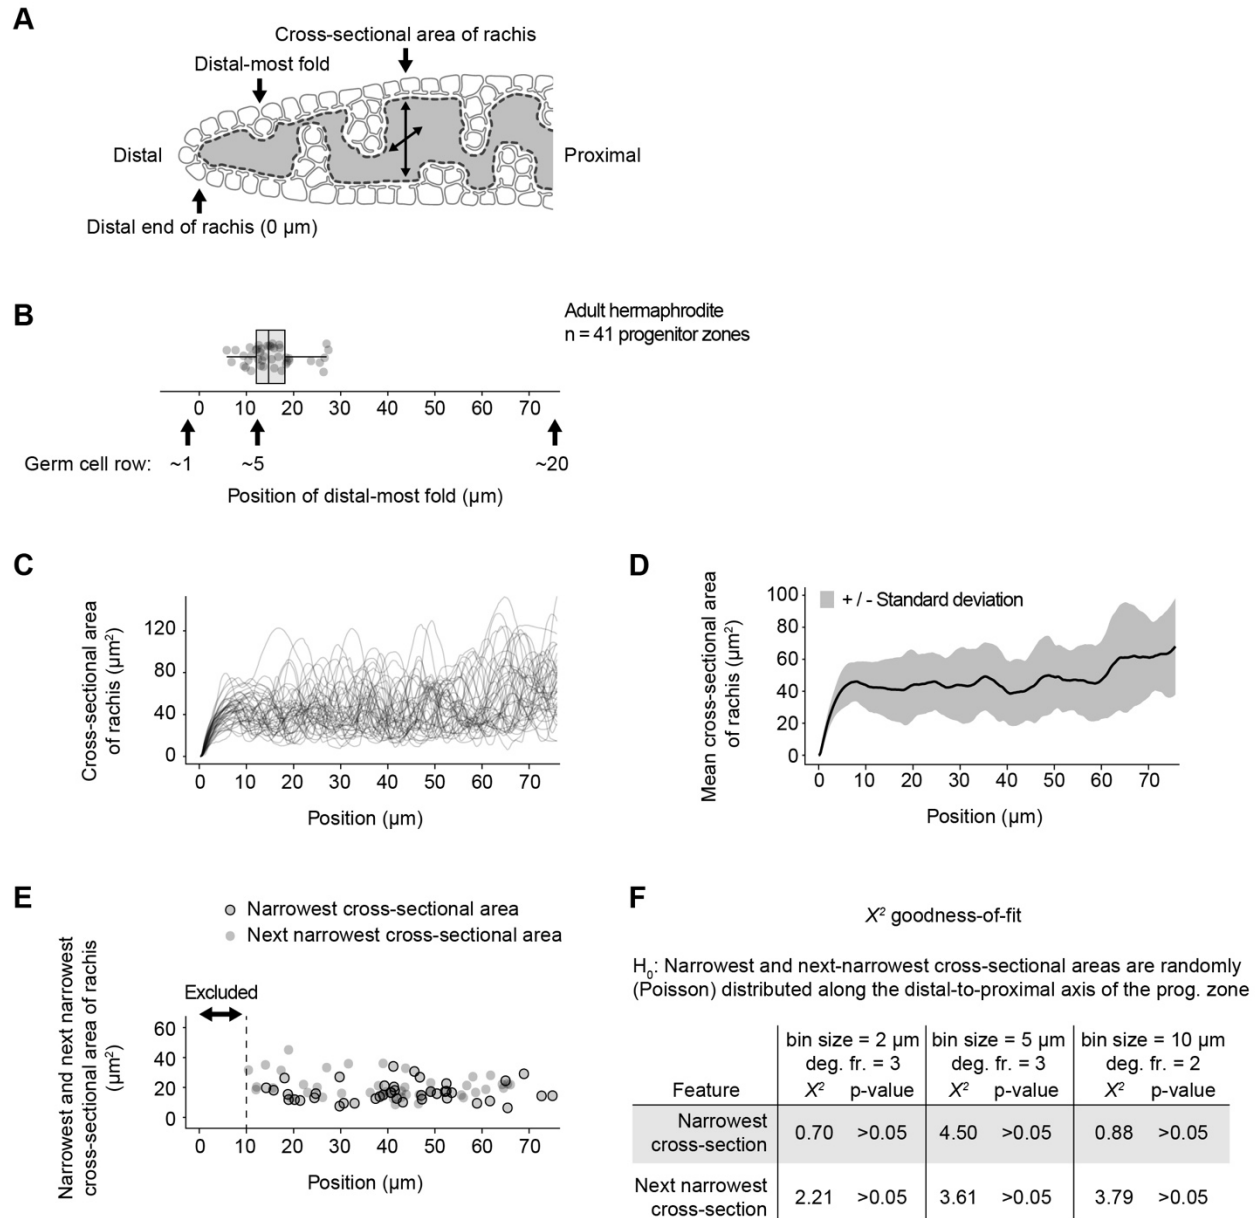

843 **Figure S2. Germline folds are absent from distal-most germ cells but elsewhere are**  
844 **positioned randomly in the progenitor zone.**

845 (A-E) Positional analysis of distal-most folds and rachis cross-sectional area in 41 adult  
846 hermaphrodite progenitor zones. Cross-sectional area of the rachis provides a read-out of fold  
847 position because cross-sectional area is larger where folds are absent or shallow. (A) Schematic  
848 of positional analysis. The distal-most tip of the rachis was defined as position 0  $\mu\text{m}$ . (B) Position  
849 of distal-most fold. Boxplot: center bar, median; box, interquartile range (IQR); whiskers, most  
850 extreme value within 1.5\*IQR from box. (C) Cross-sectional area of the rachis. Individual  
851 progenitor zones are over-plotted as separate curves. (D) Mean cross-sectional area of the rachis.  
852 (E) Narrowest and next-narrowest cross-sectional area of the rachis. This analysis excluded the

853 distal-most 10  $\mu\text{m}$  of the rachis, because the narrowest area necessarily occurs at the distal-most  
854 tip. Analysis of next-narrowest area excluded an additional window of 10  $\mu\text{m}$ , centered on the  
855 narrowest area, to ensure that the next-narrowest area occurred outside the local minimum of the  
856 narrowest area. (F) Results of  $X^2$  goodness-of-fit test comparing observed positions of narrowest  
857 and next-narrowest areas to positions expected under a random (Poisson) model. Bins of 2  $\mu\text{m}$ ,  
858 5  $\mu\text{m}$ , or 10  $\mu\text{m}$  yield Poisson parameter ( $\lambda$ ) values of 1.2, 2.9, and 5.6, respectively, therefore  
859 spanning the recommended bin sizes for testing against a Poisson model.

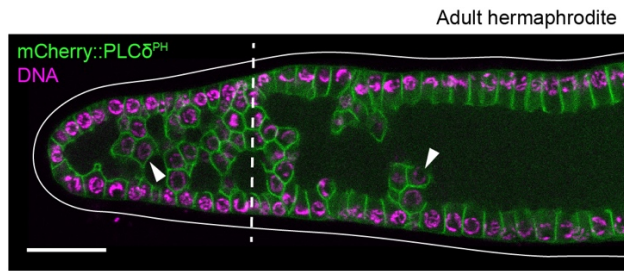

860 **Figure S3. Germline folds visible using the plasma membrane marker mCherry::PLC $\delta^{\text{PH}}$ .**  
861 Adult hermaphrodite progenitor zone expressing mCherry::PLC $\delta^{\text{PH}}$  and stained for DNA. Solid  
862 line, outline of gonad. Asterisk, distal end of gonad. Dashed line, boundary of progenitor zone.  
863 Arrowhead, example of germ cell positioned within a germline fold. Scale bar, 20  $\mu\text{m}$ .



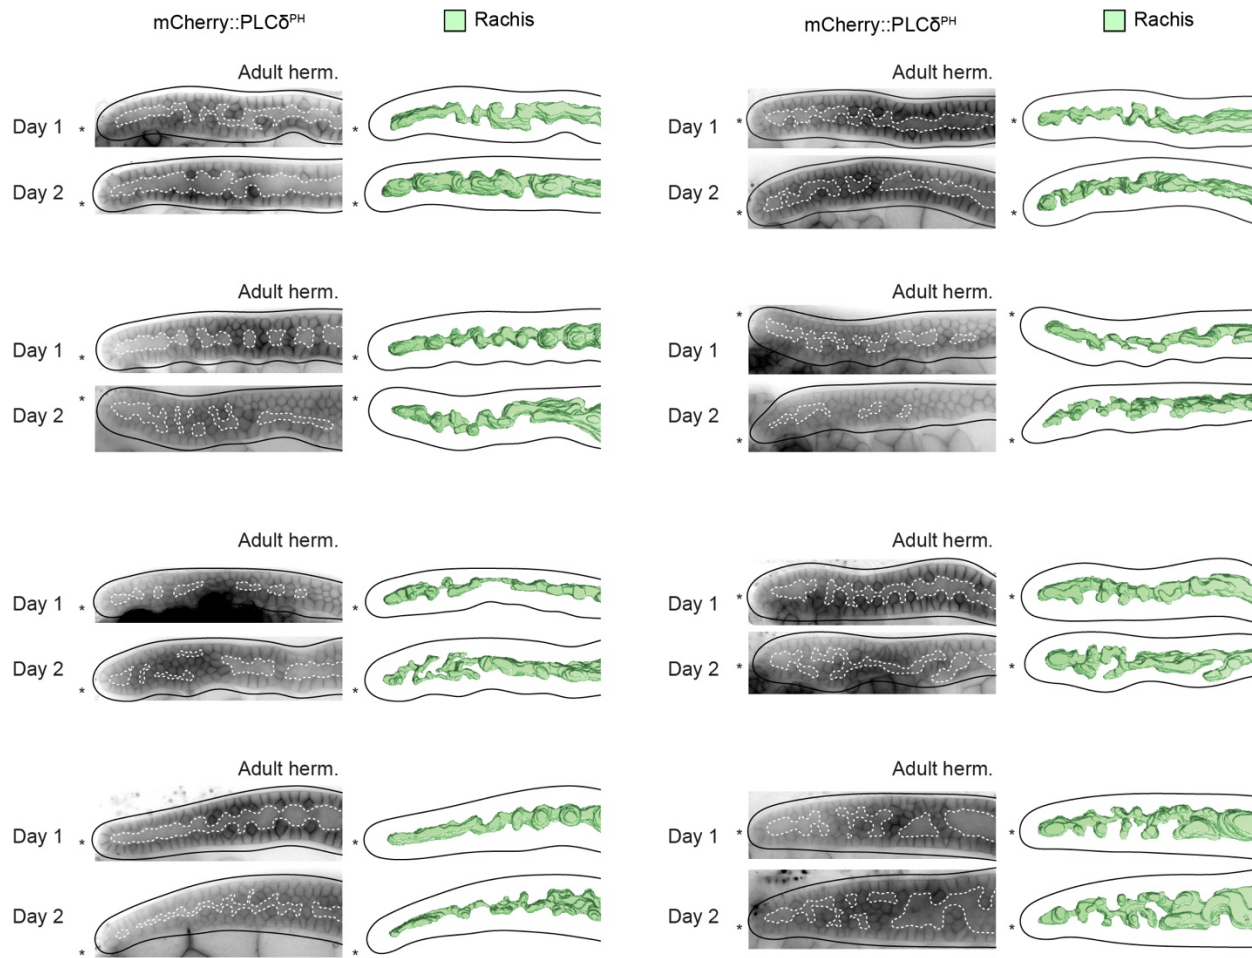

864 **Figure S4. Additional examples of adult hermaphrodite progenitor zones imaged on day 1**  
865 **and day 2 of adulthood.**

866 Left of each pair, adult hermaphrodite progenitor zones expressing mCherry::PLC $\delta^{PH}$ . Images  
867 have been processed with background subtraction. Dashed white line, rachis. Right of each pair,  
868 model of rachis. Solid line, outline of gonad. Asterisk, distal end of gonad. Scale bar, 20  $\mu$ m.

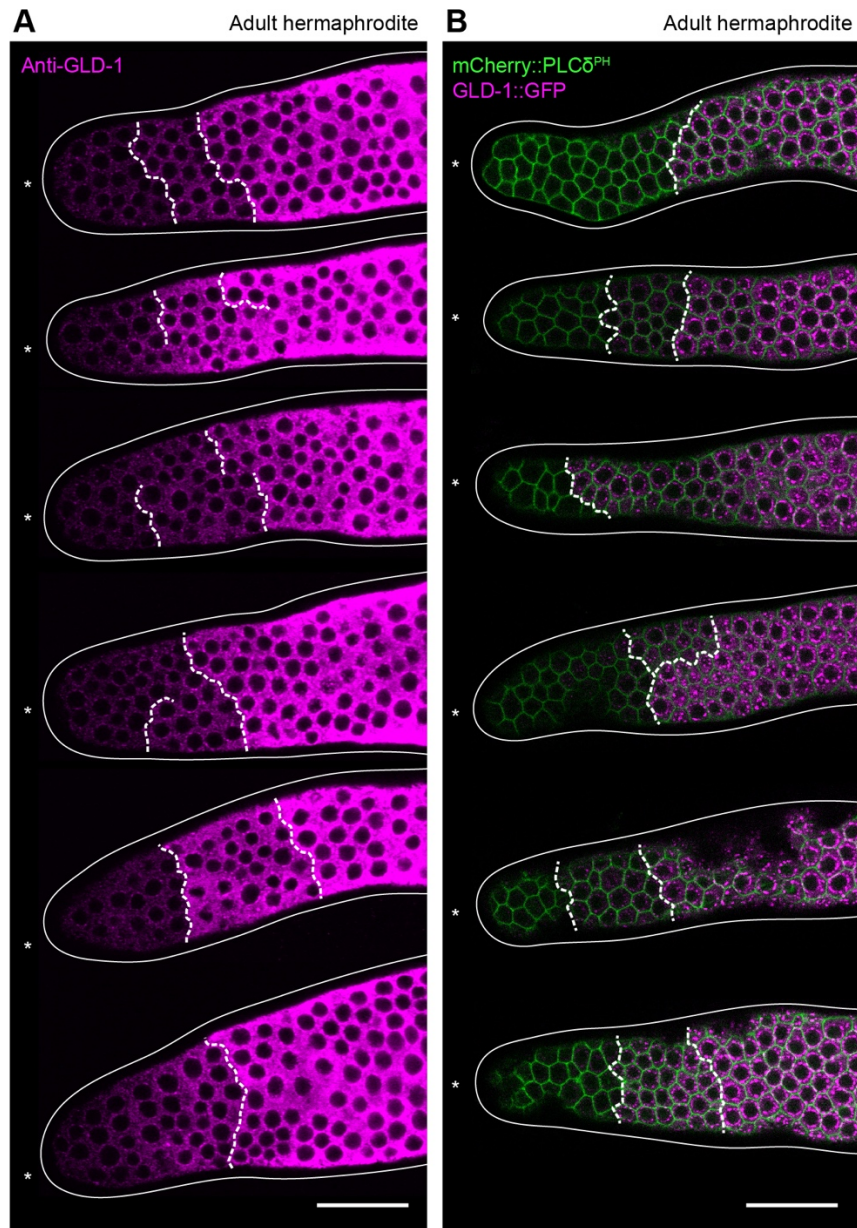

869 **Figure S5. Randomly selected examples of GLD-1 steps.**

870 (A) Adult hermaphrodite progenitor zones stained for GLD-1. (B) Adult hermaphrodite progenitor  
871 zones expressing GLD-1::GFP and mCherry::PLCδ<sup>PH</sup>. (A-B) Solid line, outline of gonad. Asterisk,  
872 distal end of gonad. Dashed line, GLD-1 step. Scale bar, 20 μm.

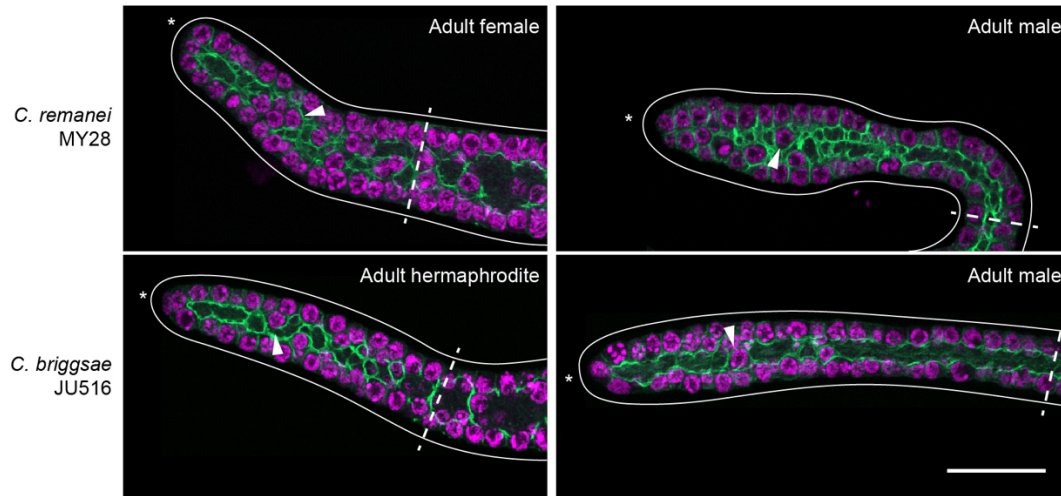

873 **Figure S6. Germline folds in *C. briggsae* and *C. remanei*.**  
874 Adult *C. briggsae* and *C. remanei* progenitor zones stained for F-actin and DNA. Images are  
875 maximum-intensity z-projections through a z-range of 1.5  $\mu\text{m}$ . Arrowhead, example of germ cell  
876 positioned within a germline fold. Solid line, outline of gonad. Dashed line, boundary of progenitor  
877 zone. Asterisk, distal end of gonad. Scale bar, 20  $\mu\text{m}$ .
